# Supplementary material for: Pulsatile inputs achieve tunable attenuation of gene expression variability and graded multi-gene regulation
Source: PubMed Central journal article supplement (PMC6117348; doi:10.1038/s41467-018-05882-2), 2018-08-30
Supplement: 41467_2018_5882_MOESM1_ESM.pdf [file 41467_2018_5882_MOESM1_ESM.pdf]

# **Pulsatile inputs achieve tunable attenuation of gene expression variability and graded multi-gene regulation**

Dirk Benzinger and Mustafa Khammash

## **Supplementary Information**

Contains:

Supplementary Figures 1-14

Supplementary Notes 1-5

Supplementary Tables 1-7

**Supplementary Figures:**

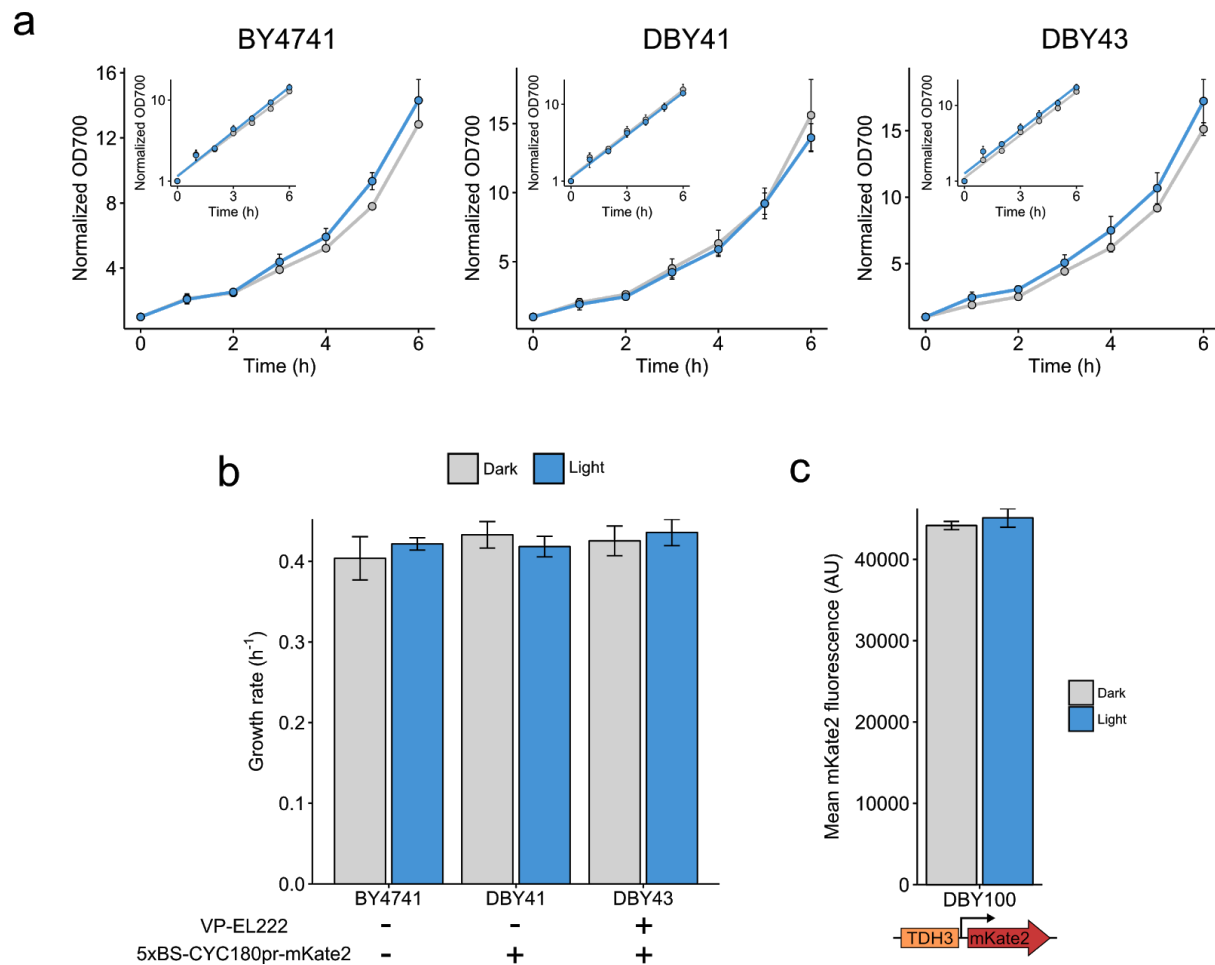

**Supplementary Figure 1.** VP-EL222 expression and illumination does not affect cell growth and constitutive gene expression. **(a)** Yeast strains, with or without the VP-EL222 and a reporter construct (5xBS-CYC180pr-mKate2), were grown in the dark (grey) or under blue light illumination ( $420 \mu\text{W cm}^{-2}$ ) (blue) for 6 h. The  $\text{OD}_{700}$  was measured every hour and the growth rate was calculated by performing linear regressions on log-transformed OD-data (see inset). Data represents the mean and s.d. of two independent experiments and was normalized by the  $\text{OD}_{700}$  value at  $t=0$ . **(b)** Calculated growth rates for the growth experiments shown in (a). Data represents the mean and s.d. of two independent experiments. The average growth rate of all experiments is  $0.42 \text{ h}^{-1}$ . This value was used as the protein dilution rate in the mathematical modeling. **(c)** A yeast strain expressing mKate2 constitutively from the *TDH3* promoter (DBY100) was grown either in the dark or under illumination ( $420 \mu\text{W cm}^{-2}$ ) for 6 h. The average cellular mKate2 fluorescence was measured using flow cytometry. Data represents the mean and s.d. of two independent experiments.

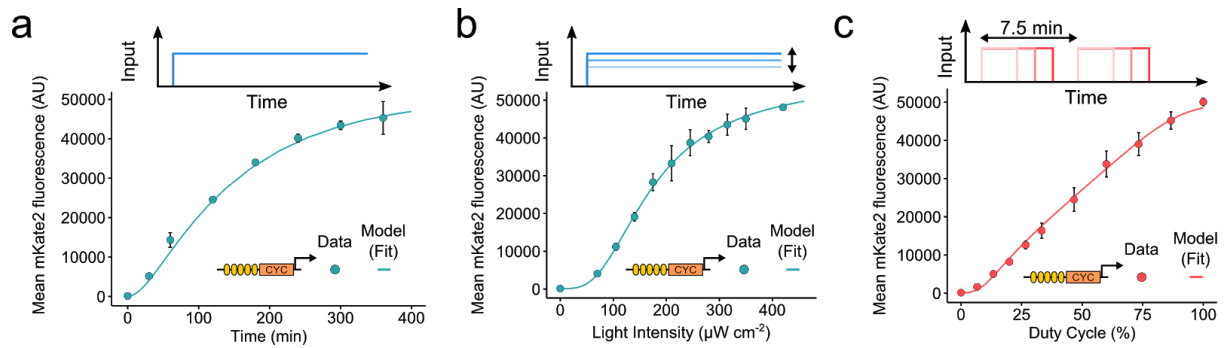

**Supplementary Figure 2.** Characterization experiments and results of model fitting. Three characterization experiments were performed with DBY43 (containing the VP-EL222 and a reporter construct (5xBS-CYC180pr-mKate2)). Data points represent mean cellular mKate2 fluorescence (measured by flow cytometry, mean and s.d. of three independent experiments) and lines represent the model fits. (a) Time-course of VP-EL222 mediated gene expression. Cells were illuminated with blue light ( $350 \mu\text{W cm}^{-2}$ ) for 6 h and fluorescence was measured at regular intervals. (b) Dose response to AM / light intensity. Fluorescence was measured after 6 h of illumination. (c) Dose response to PWM with a 7.5 min period. The light intensity was  $420 \mu\text{W cm}^{-2}$ .

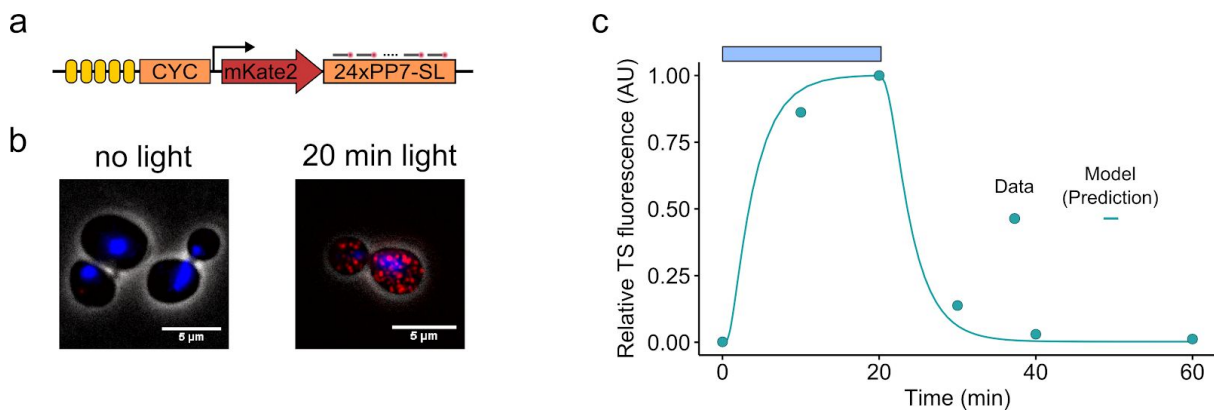

**Supplementary Figure 3.** smFISH analysis of VP-EL222 mediated transcription. A yeast strain containing VP-EL222 and a reporter construct containing a sequence coding for 24 copies of the PP7 stem loop (5xBS-CYC180pr-mKate2-24xPP7-SL) were grown under blue light illumination ( $420 \mu\text{W cm}^{-2}$ ) for 20 min and subsequently in the dark for 40 min. Samples were taken before illumination and after 10, 20, 30, 40, 60 min. smFISH was performed with CY3 labeled probes complementary to the PP7-SL (probe sequences are listed in **Supplementary Table 3**). (a) Schematic of the reporter construct. (b) Representative microscopy images before and after 20 min of illumination. Grayscale: phase contrast / cell boundaries, blue: DAPI channel (maximum intensity projection), red: CY3 channel (maximum intensity projection). Scale bars represents 5  $\mu\text{m}$  (c) Time-course of nascent RNA quantification. Points represent measured fluorescence at the transcription site (TS) relative to the maximal value at 20 min (see **Methods** for details on the quantification). The line represents the model prediction for nascent RNA accumulation (see **Supplementary Note 1 'Estimating nascent RNA accumulation'** for modeling details).

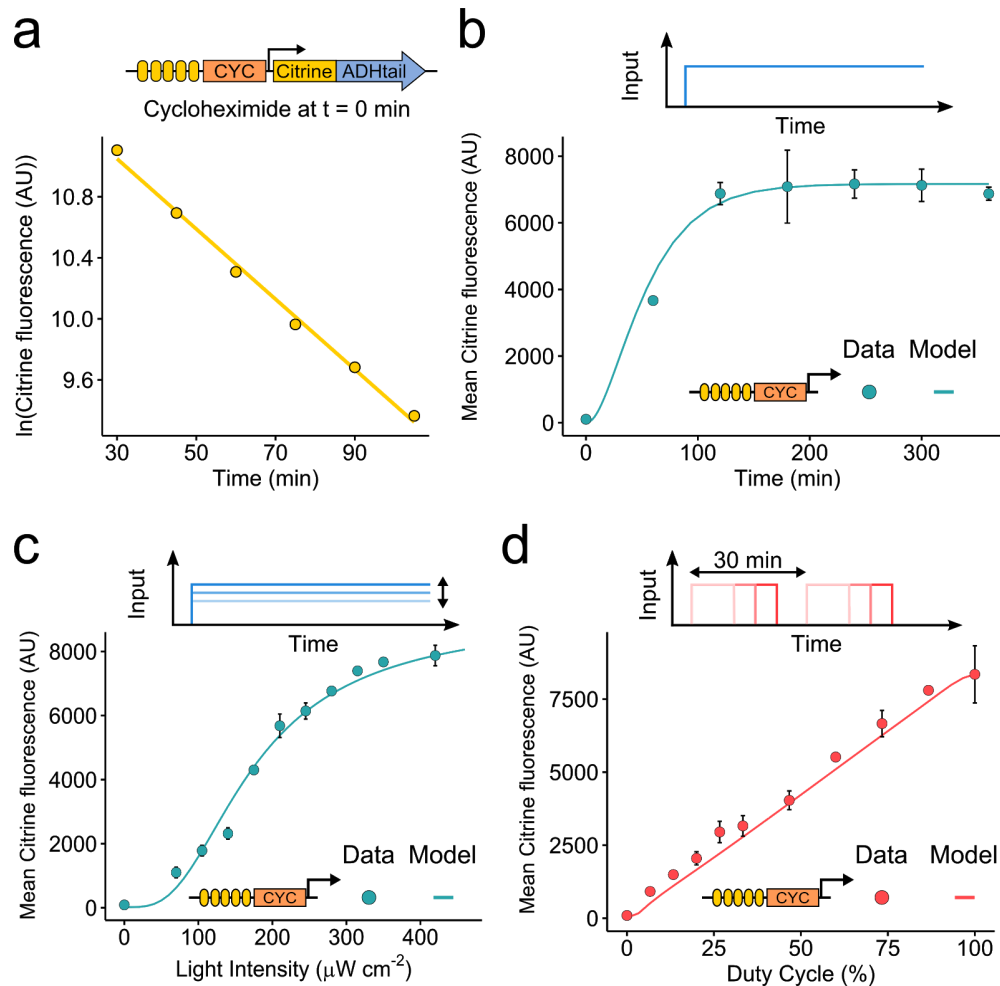

**Supplementary Figure 4.** Characterization experiments of destabilized FP expression. Four characterization experiments were performed with DBY149, expressing the Citrine-ADHtail FP<sup>1,2</sup> construct under control of 5xBS-CYC180pr. (a) Degradation rate measurement for the destabilized Citrine FP variant. DBY149 was illuminated with blue light (420  $\mu\text{W cm}^{-2}$ ) for 6 h after which cycloheximide was added to the culture to a final concentration of 0.1 mg/ml. Fluorescence was measured every 15 min starting 30 min after cycloheximide addition. The degradation rate was found to be  $0.023 \text{ min}^{-1}$  based on a linear regression to log-transformed fluorescence data (see graph). (b) Time-course of VP-EL222 mediated gene expression. Cells were illuminated with blue light (350  $\mu\text{W cm}^{-2}$ ) for 6 h and fluorescence was measured at regular intervals. (c) Dose response to AM / light intensity. Fluorescence was measured after 6 h of illumination. (d) Dose response to PWM with a 30 min period. The light intensity was 420  $\mu\text{W cm}^{-2}$ . For (b)-(d) data points represent mean cellular Citrine fluorescence (mean and s.d. of two independent experiments) and lines represent the modeling results. Model parameters were the same as used for the stable FP mKate2 (see **Supplementary Table 4**) but the protein degradation rate  $k_{\text{degP}}$  was adjusted to  $0.03 \text{ min}^{-1}$  (pure protein degradation rate (see (a)) + dilution by cell growth). Model predictions were multiplied by a constant to bring experimental and modeling results to the same maximal value. This normalization was necessary as characterization experiments for model fits were performed solely based on experiments using the stable mKate2 fluorescent protein as a reporter.

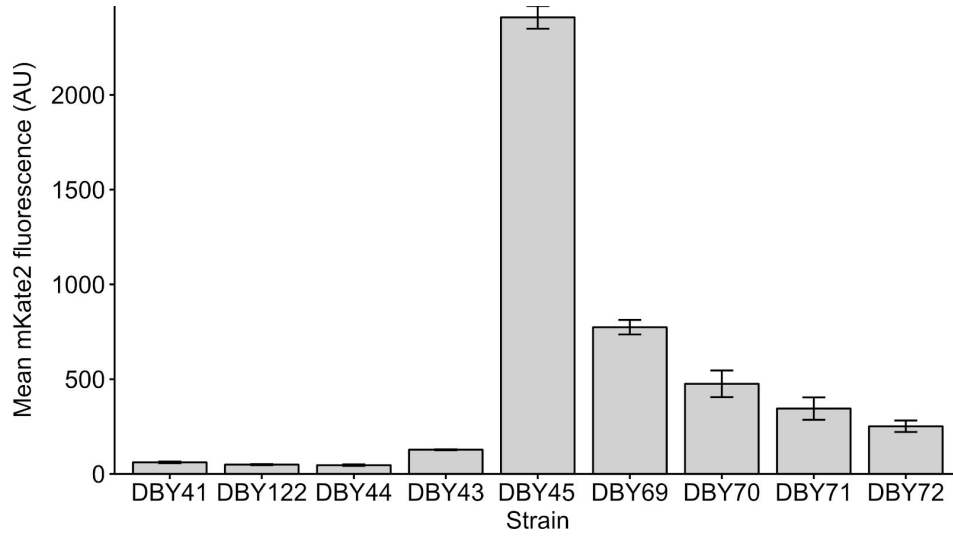

**Supplementary Figure 5.** Comparison of expression from different VP-EL222 regulated promoters in the dark. Strains, expressing mKate2 under the control of different promoters (see **Supplementary Table 2**), were cultured for 6h in the dark. The average cellular mKate2 fluorescence was measured using flow cytometry. Data represents the mean and s.d. of three independent experiments.

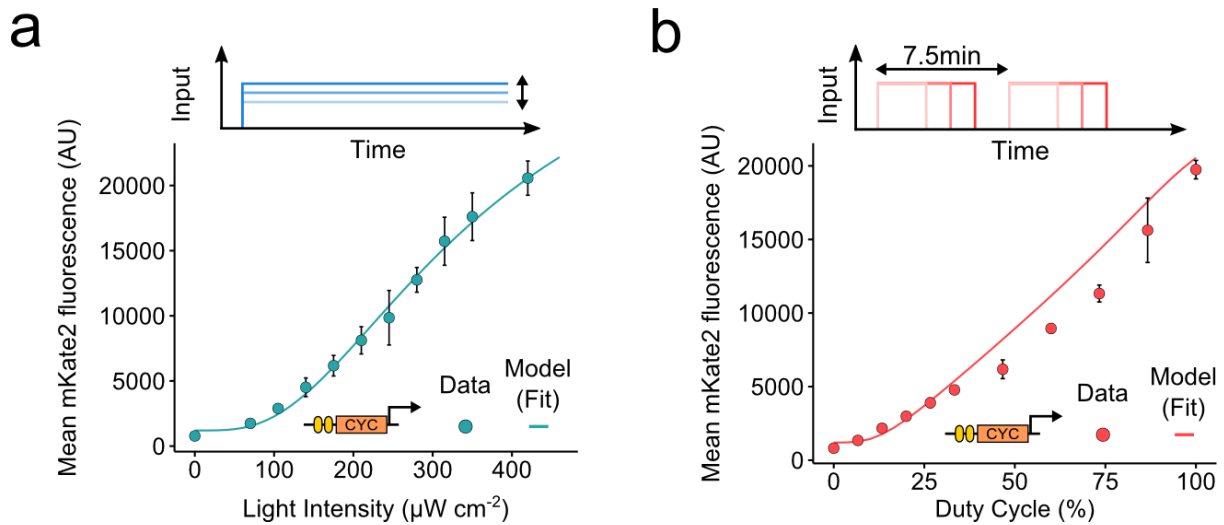

**Supplementary Figure 6.** Model fits for a VP-EL222 regulated promoter based on the *CYC180* promoter with two VP-EL222 binding sites (2xBS-*CYC180*pr, DBY69). Data points represent mean cellular mKate2 fluorescence (measured by flow cytometry after 6 h of illumination, mean and s.d. of three independent experiments) and lines represent the model fits. **(a)** Dose response to AM / light intensity. **(b)** Dose response to PWM / duty cycle. The PWM period was 7.5 min. The light intensity was  $420 \mu\text{W cm}^{-2}$ . See also **Supplementary Note 1 'Refitting of promoter-specific model parameters'**.

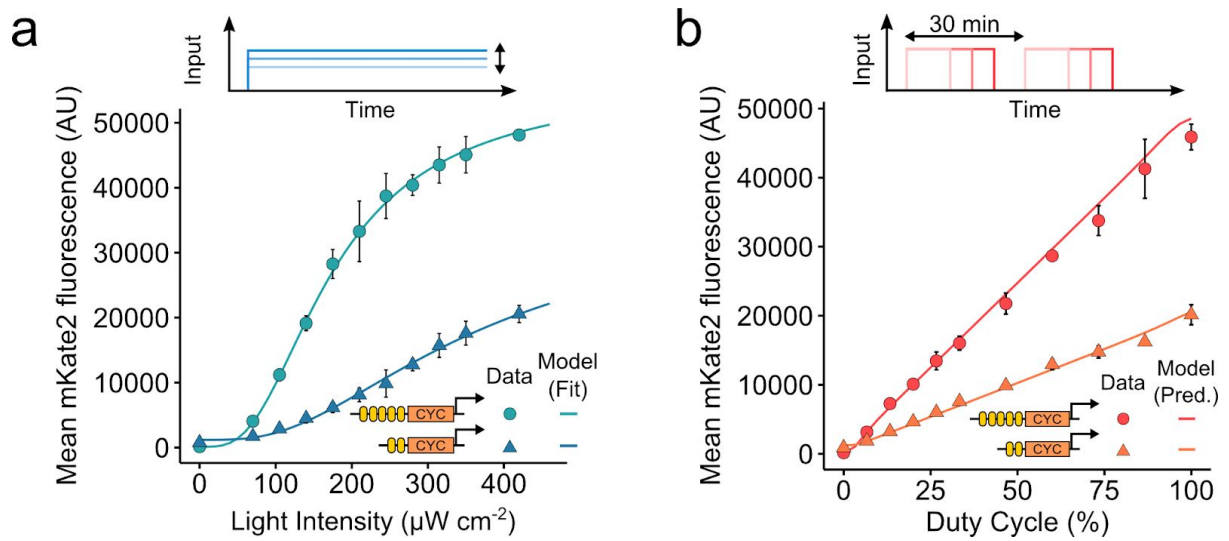

**Supplementary Figure 7.** Non-normalized curves showing the coregulation of 2xBS-CYC180pr and 5xBS-CYC180pr. Dose-response of the two promoters to AM (a) and PWM (b). Strains expressing mKate2 under the control of either a *CYC180* promoter with five (circle, 5xBS) or two (triangle, 2xBS) VP-EL222 binding sites were grown under the illumination conditions depicted on the x-axis for 6 h. The light intensity and period for PWM were  $420 \mu\text{W cm}^{-2}$  and 30 min. Data represents the mean and s.d. of three independent experiments. Lines represent model fits or predictions.

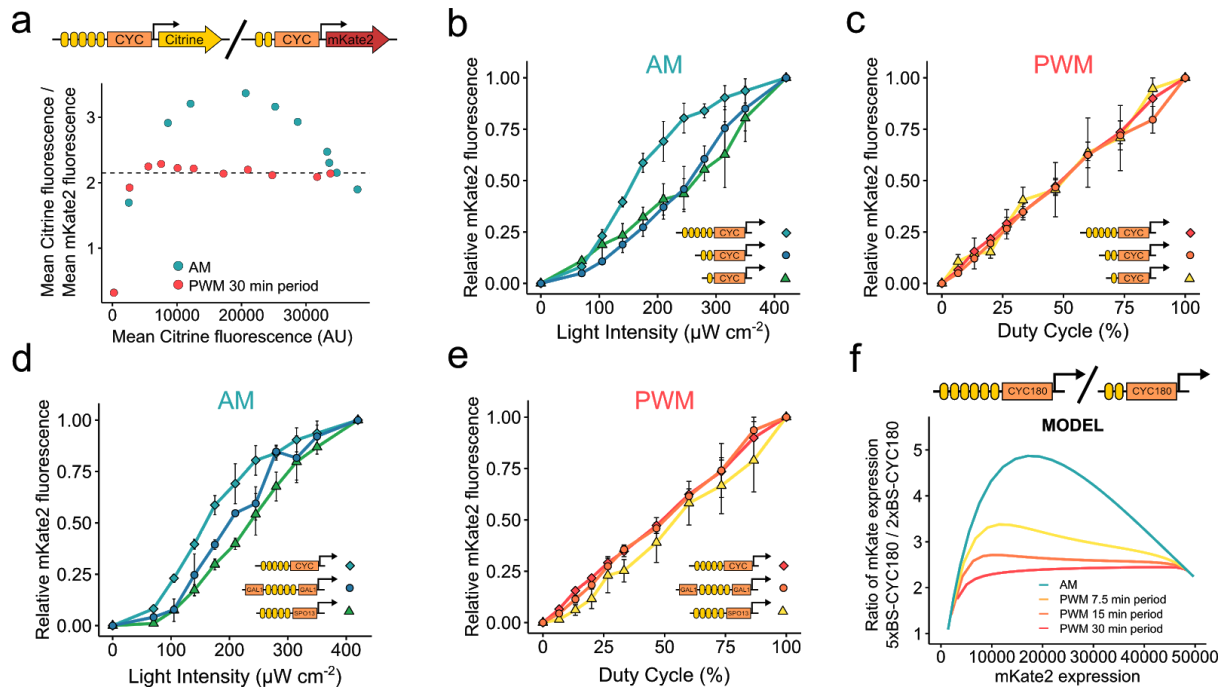

**Supplementary Figure 8.** Further results on PWM mediated co-regulation. **(a)** Co-regulation of  $5 \times \text{BS-CYC180pr-mCitrine}$  and  $2 \times \text{BS-CYC180pr-mKate2}$  in single cells. The diploid yeast strain DBY118 was grown under different induction conditions for 6h and fluorescence was analyzed using flow-cytometry. PWM was performed with a 30 min period and a light intensity of  $420 \mu\text{W cm}^{-2}$ . AM was performed with the following light intensities: 105, 140, 175, 210, 245, 280, 315, 350, 420,  $490 \mu\text{W cm}^{-2}$ . The dashed line represents this ratio at constant illumination with a light intensity of  $420 \mu\text{W cm}^{-2}$ . **(b) - (e)** Dose response of promoters differing in their binding site numbers (b,c) or promoter backbones (d,e) to AM (b,d) and PWM (c,e). Strains expressing mKate2 under the control of the respective promoters (depicted schematically on the plots) were grown under the illumination conditions depicted on the x-axis for 6 h. The light intensity and period for PWM were  $420 \mu\text{W cm}^{-2}$  and 30 min. Mean cellular fluorescence measurements were normalized to be 0 in the dark and 1 at the highest input level to allow for easy comparison. Data represents the mean and s.d. of two to three independent experiments. **(f)** Model results for the effect of AM and PWM with different periods on co-regulation of gene expression from  $5 \times \text{BS-CYC180pr}$  and  $2 \times \text{BS-CYC180pr}$ .

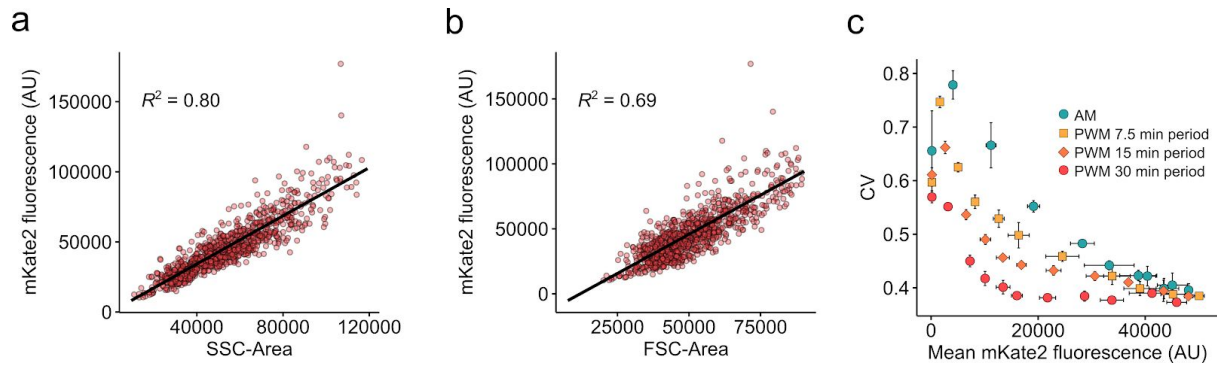

**Supplementary Figure 9.** Normalization of cellular fluorescence by scatter as a proxy for cell size. Differences in cell size can lead to strong cell-to-cell variability in cellular protein abundances that can mask the magnitude of other variability sources. We thus analyzed the correlation of side scatter (**a**, SSC) and forward scatter (**b**, FSC) with constitutive mKate2 expression from the *TDH3* promoter. Points represent individual cells. Lines represent linear regressions with the  $R^2$  values shown on the graph. We found that both SSC and FSC correlate linearly with gene expression. Due to the stronger correlation with SSC, we decided to normalize fluorescence values by dividing, for each cell the fluorescence readout by the SSC readout. (**c**) CV as function of mean expression levels from 5xBS-CYC180pr for different inputs. The experiment is the same as shown in **Fig 3a**, without normalization by SSC. The data shows that the qualitative relationships are not affected by normalization.



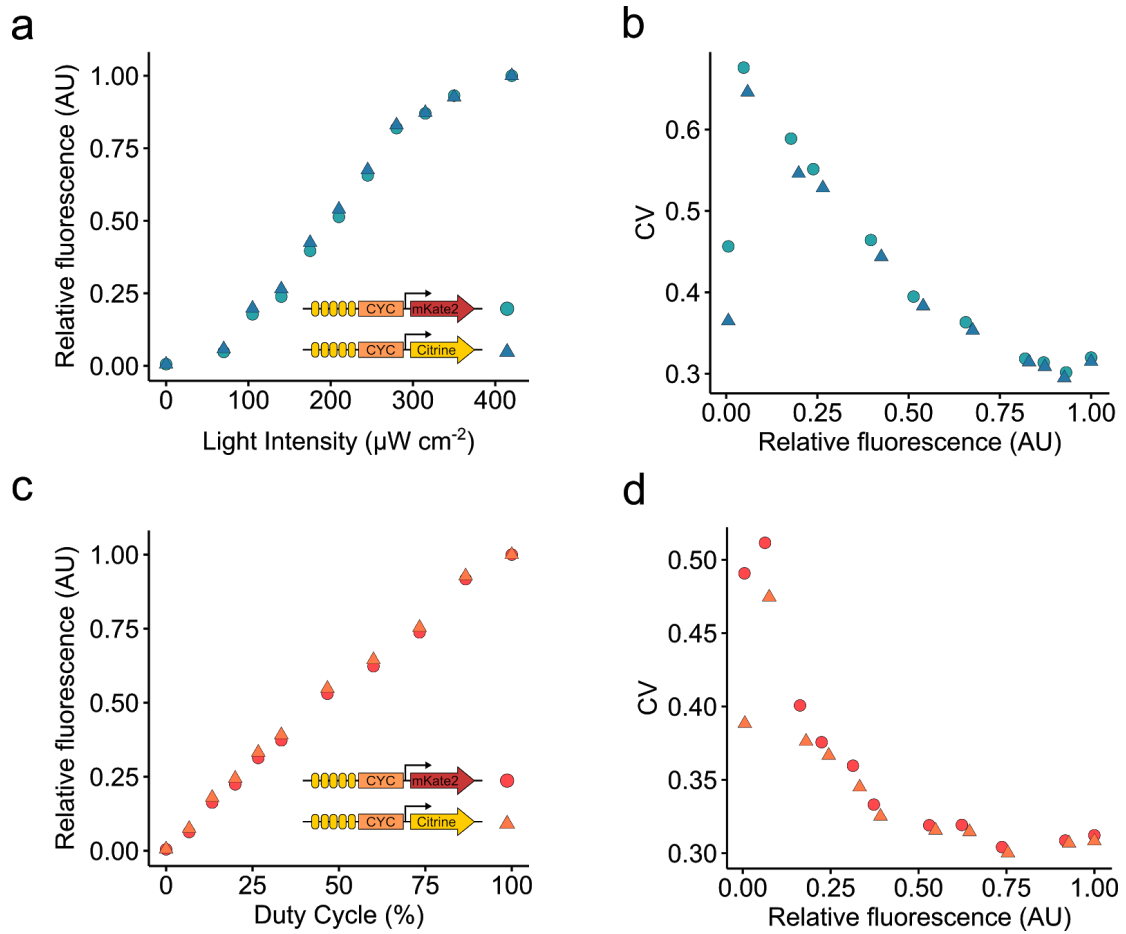

**Supplementary Figure 10.** Equivalence of mKate2 and mCitrine reporters used for dual-color noise decomposition. AM (**a,b**) and PWM (**c,d**) experiments were performed with the diploid yeast strain DBY110 expressing both mKate2 and mCitrine from 5xBS-CYC180pr. Dose response curves (**a,c**) were normalized by dividing each measured value by the maximum value obtained for a given FP in order to reach equivalent fluorescence values for mKate2 and mCitrine. Cells were illuminated under the conditions depicted on the x-axis for 6 h. The light intensity and period for PWM were  $420 \mu\text{W cm}^{-2}$  and 30 min. (**b,d**) CV is plotted against mean expression for the same experiment shown in (a) and (c) to analyze the equivalence of FP distributions. The CV differs under non-induced conditions. This likely results from differences in cellular autofluorescence in both fluorescence channels.

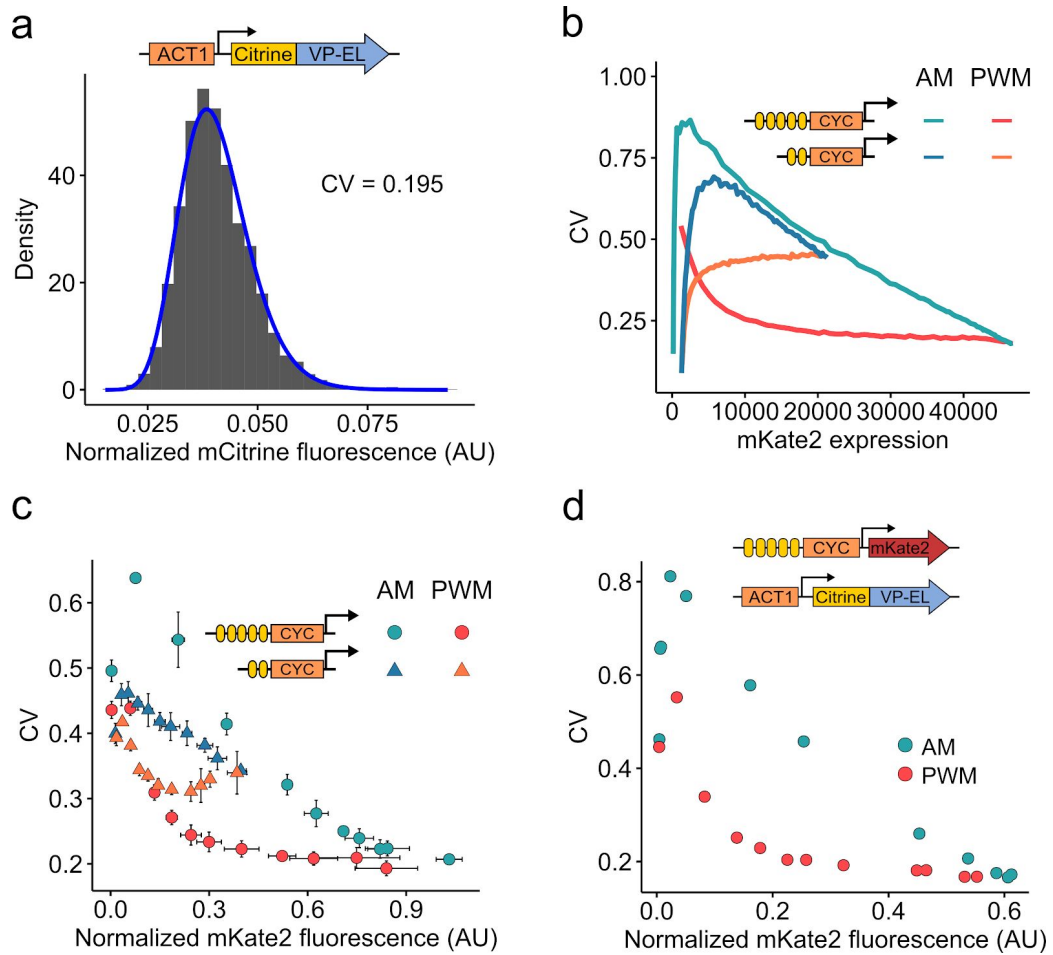

**Supplementary Figure 11.** Measurement and modeling of VP-EL222 variability. **(a)** Distribution of SSC-normalized mCitrine fluorescence as measured by flow cytometry. Cells express mCitrine-VP-EL222 under control of the *ACT1* promoter. The line represents the fit of a log-normal distribution to the data. The CV of the fitted distribution is shown on the graph. **(b)** The CV-mean expression relationships as calculated from the model for 5xBS-CYC180pr and 2xBS-CYC180pr are shown. The response to AM (blue) and PWM (red/orange) was evaluated. PWM conditions: 30 min period, 420  $\mu\text{W cm}^{-2}$  light intensity. **(c)** The CV is plotted as a function of mean expression from 5xBS-CYC180pr (circle) and 2xBS-CYC180pr (triangle) in response to AM (blue) and PWM (red/orange). For 5xBS-CYC180pr, results and induction conditions are the same as in **Fig. 3a** with a 30 min PWM period. Results for 2xBS-CYC180pr were obtained under the same conditions. Data represents the mean and s.d. of three independent experiments. **(d)** The CV is plotted as a function of mean expression for mCitrine-VP-EL222 mediated expression from 5xBS-CYC180pr under AM and PWM. Cells were analyzed after 2h of induction. The light intensity and period for PWM were 350  $\mu\text{W cm}^{-2}$  and 30 min. Pulse durations were: 0, 1, 2, 4, 6, 8, 10, 14, 18, 22, 26, 30 min. Light intensities for AM were: 0, 7, 14, 28, 42, 56, 70, 105, 140, 210, 280, and 350  $\mu\text{W cm}^{-2}$ .

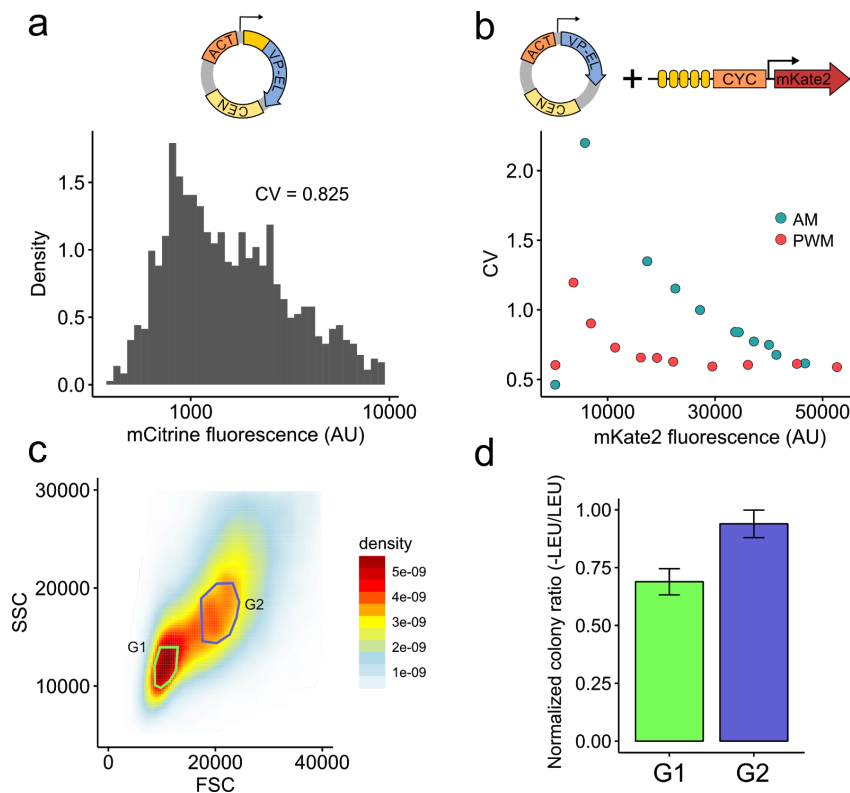

**Supplementary Figure 12.** Effects of VP-EL222 expression from centromeric plasmid. (a) Distribution of mCitrine fluorescence as measured by flow cytometry. Cells express mCitrine-VP-EL222 under control of the *ACT1* promoter from a centromeric plasmid (DBY128). mCitrine fluorescence was not normalized due to a low correlation of fluorescence with SSC. The CV of the fluorescence distribution is shown on the graph. (b) The CV is plotted as a function of mean expression from 5xBS-*CYC180pr* in response to AM (blue) and PWM (red) in a strain expressing VP-EL222 from a centromeric plasmid (DBY112). Cells were induced for 6 h before analysis. The following induction conditions were used: AM: 0, 35, 70, 105, 140, 175, 210, 245, 280, 350, 420  $\mu\text{W cm}^{-2}$  light intensity. PWM: 420  $\mu\text{W cm}^{-2}$  light intensity; 45 min period; 0, 3.3, 6.7, 13.3, 20, 26.7, 33.3, 46.7, 60, 90, 100 % duty cycle. (c) and (d) For strains containing centromeric VP-EL222 plasmids, we found that a subpopulation of yeast cells (G2 in (c)) defined based on forward and side scatter showed a higher percentage of light-responsive cells than the whole population. In order to verify our assumption that the responsiveness results from a higher degree of plasmid retention and justify the use of this population in our experiments, we compared plasmid retention / *LEU2* marker expression in these population. Cells of the two populations shown in (c) were sorted and plated on SD plates with or without L-Leucine (LEU / -LEU). Sorting was performed with strains DBY112 (VP-EL222 on centromeric plasmid) and DBY43 (stable integration of VP-EL222). Colonies were counted after 3 days of growth. Colony ratios between -LEU and LEU plates for DBY112 relative to the values obtained for DBY43 are shown in (d) for the two populations marked in (c). The data indicates relatively low plasmid loss in population G2 and increased plasmid loss in population G1. Data represents mean and s.d. of two technical replicates of yeast dilution and plating for a single sorting experiments.

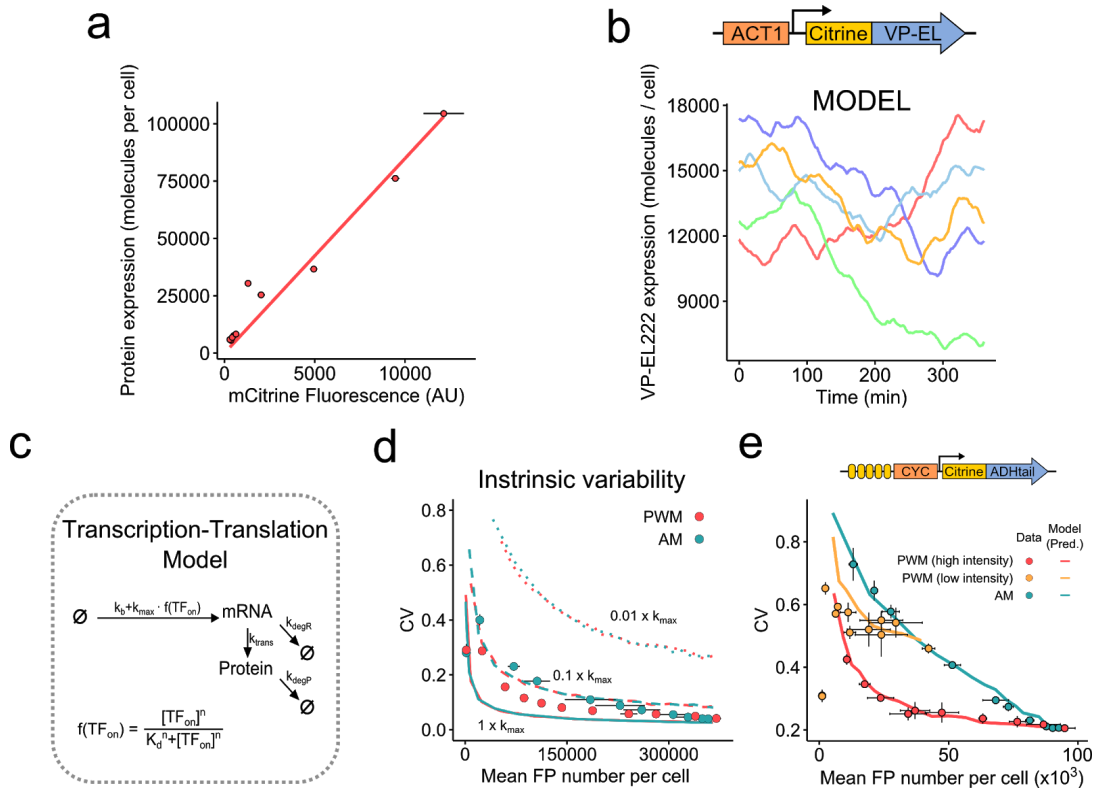

**Supplementary Figure 13.** Additional data related to the stochastic modeling approach. **(a)** A calibration curve relating the measured fluorescence of reference strains to their known protein copy numbers. See **Supplementary Table 5** for protein identities and copy numbers. For details see **Supplementary Note 4**. Data represents mean and s.d. of two independent experiments, line represents the result of a zero-intercept linear regression. **(b)** Simulated single-cell traces for VP-EL222 expression. See **Supplementary Note 4** for details on modeling. **(c)** Graphical representation of reporter gene expression modeled using a simple transcription-translation model (see **Supplementary Note 4** for details). **(d)** Modeling results using the transcription-translation model (lines) and experimental data (circles) showing intrinsic contributions to gene expression variability for AM (blue) and PWM (red) (see **Supplementary Table 6** for model parameters). A dual color reporter experiment was simulated for 6h and the noise decomposition procedure was applied to the simulated data as described in the Methods section for the experimental data. Simulations were performed for different values of the maximal transcription rate  $k_{\max}$  (line type, relative change is indicated next to the lines, basal transcription rate and the translation rate were adjusted to result in the same maximal FP expression level). Experimental results are the same as shown in **Fig. 3b**. **(e)** Model predictions for a strain expressing the destabilized Citrine FP under control of the 5xBS-CYC180pr (DBY149) using different types of light induction (as indicated on the plot). Period and light intensity for PWM were 30 min and either 140  $\mu\text{W cm}^{-2}$  (yellow) or 420  $\mu\text{W cm}^{-2}$  (blue). Light intensities and duty-cycles were the same as shown in **Fig. 2b,c**. Cellular fluorescence was normalized by side-scatter measurements to reduce the influence of cell size (Methods) and values were multiplied by a constant to bring experimental and modeling results to the same maximal value. Data represents mean and s.d. of two independent experiments. See **Supplementary Table 6** for model parameters.

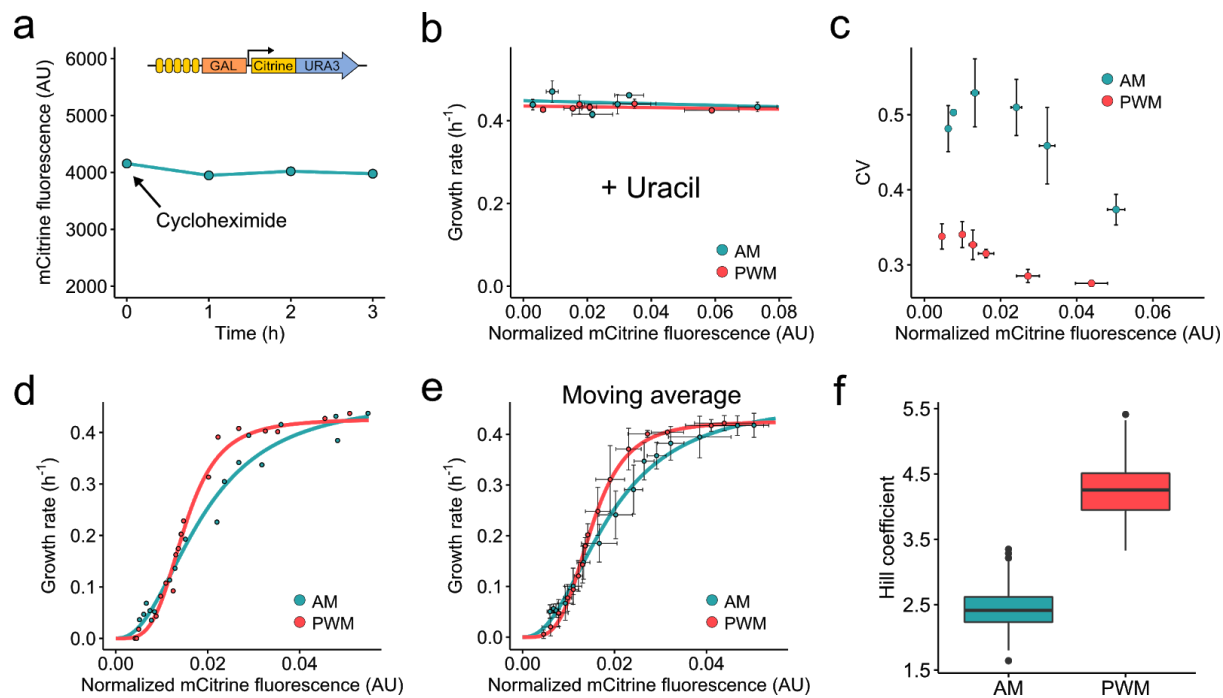

**Supplementary Figure 14.** Additional data related to measuring the effects of *URA3* expression on growth (Fig. 5). **(a)** Stability of mCitrine-labeled Ura3p. A strain expressing mCitrine-Ura3p from 5xBS-*GAL1*pr was grown under blue light illumination ( $162 \mu\text{W cm}^{-2}$ ) for 14 h. Cycloheximide was added to the culture media to a final concentration of 0.1 mg/ml and fluorescence was measured over 3h. **(b)** Effect of light-induced *URA3* expression on cellular growth in uracil-rich SD medium. The same strain as in (a) was grown for 19 h under multiple blue-light illumination conditions. Cell growth was measured over the last 5 h of the experiment. AM (blue) was performed with light intensities ranging from 0 to  $162 \mu\text{W cm}^{-2}$  and PWM (red) was performed with a 30 min period and a light intensity of  $420 \mu\text{W cm}^{-2}$ . Data represents mean and s.d. of two independent experiments. Lines represent results of linear regressions to the experimental data. **(c)** CV as a function of mean mCitrine expression regulated by AM (blue) and PWM (red) in a strain expressing mCitrine-Ura3p from 5xBS-*GAL1*pr. Data is derived from the experiment shown in Fig. 5a. Data represents the mean and s.e.m. of three independent experiments. **(d)** Data of all individual experiments summarized in Fig. 5a. **(e)** To visualize the differences in dose-response curves shown in (d), the data was smoothed using a moving average with a window size of three data points along the x-axis. Data represents mean and s.d. for each set of three data points. **(f)** In order to evaluate differences in hill coefficient estimates between hill-function fits (for AM and PWM) to the experimental data shown in (d), fitting was performed for 500 bootstrap samples. Distributions of hill coefficient estimates from these fits are presented as box plots. Outliers (dots) are defined as values with a distance from the median greater than 1.5 times the interquartile range.

## **Supplementary Note 1: Mathematical Modeling of the VP-EL222 mediated expression**

In the following section, the specifics about the ordinary differential equation (ODE) model and parameter inference are explained.

### **A simple ODE model describing VP-EL222 mediated gene expression**

In order to obtain a quantitative understanding of the VP-EL222 based gene expression system in *S. cerevisiae*, we constructed a mathematical model of this process. The main purpose of the model is to describe the dynamics of the system in order to understand how dynamic inputs can be used to shape the gene expression output. We thus decided to employ a simplistic gene expression model consisting of three ODEs. These ODEs describe:

- (1) Light dependent activation and of the TF VP-EL222.
- (2) TF-dependent transcription and mRNA degradation.
- (3) Protein translation and degradation.

For simplicity, we assume that TF multimerization and promoter binding occur on fast timescales compared to the transcription process and we thus use Hill-type kinetics to model the effect of activated VP-EL222 ( $TF_{on}$ ) on the transcription rate.

The model is described by the following ODEs ( $I$  denotes the blue light input and  $TF_{tot}$  denotes the total amount of cellular VP-EL222):

$$(1) \frac{dTF_{on}}{dt} = I \cdot k_{on} \cdot (TF_{tot} - TF_{on}) - k_{off} \cdot TF_{on}$$

$$(2) \frac{dmRNA}{dt} = k_{basal} + k_{max} \cdot \frac{TF_{on}^n}{K_d^n + TF_{on}^n} - k_{degR} \cdot mRNA$$

$$(3) \frac{dProtein}{dt} = k_{trans} \cdot mRNA - k_{degP} \cdot Protein$$

### **Fitting model parameters to experimental data**

The model possesses 10 parameters (9 rate parameters and the total concentration of the TF / VP-EL222 ( $TF_{tot}$ )). The value  $TF_{tot}$  acts as a scaling factor that can be completely compensated for by changes in other parameters ( $k_{on}$  and  $K_d$ ) and does not affect the dynamics of the system. We thus fixed this value to 2000 molecules/cell. All characterization experiments were performed using the VP-EL222 mediated expression of the stable fluorescent protein (FP) mKate2. We thus equate the protein degradation rate ( $k_{degP}$ ) to the

cellular growth rate of  $0.007 \text{ min}^{-1}$  (results of growth rate measurements are shown in **Supplementary Fig. 1**). Thus, we end up with 8 free parameters that need to be estimated.

For this purpose, we performed three characterization experiments using the strain DBY43, expressing mKate2 from the 5xBS-CYC180 promoter.

1. We performed time-course measurements of mKate2 expression under constant illumination conditions. This experiment was performed to elucidate the kinetics of VP-EL222 activation and (to a larger extent) that of mRNA accumulation / degradation. The kinetics of protein accumulation are given by having fixed  $k_{\text{degP}}$ .
2. We analyzed the dependence of mKate2 expression on light intensity, i.e. AM. This experiment gives us information about the mapping of light intensity to active transcription factor and finally transcription / protein expression.
3. We analyzed the dependence of mKate2 expression on the duty cycle in a PWM experiment with a short, 7.5 min period. The rationale behind this experiment is that it provides us with information about the kinetics of VP-EL222 activation and deactivation.

The results of these experiments are shown in **Supplementary Fig. 2**. We note again, that we are mainly interested in the dynamics of the gene expression system and not the absolute values of cellular mRNA or protein contents. For the model fitting, we thus assume a direct relation between fluorescence measured by flow cytometry and protein expression in the model.

Parameters were estimated by fitting the model to the mean of three independent experiments of each class of characterization experiments. To do so, we used a simplex-based search (Nelder-Mead algorithm, “fminsearch” function in Matlab) to minimize the sum of squared residuals (SSR) between the model and the data. This procedure was performed for different initial parameter values. The parameters resulting in the minimal SSR between all runs were used in this study and are reported in **Supplementary Table 1**. The model fits are shown in **Supplementary Fig. 2**.

### Refitting of promoter-specific model parameters

In order to describe protein expression from the 2xBS-CYC180 promoter with the mathematical model identified above, we need to re-fit the promoter-specific parameters,  $k_{\text{basal}}$ ,  $k_{\text{max}}$ ,  $K_d$ , and  $n$ . To do so, we performed two characterization experiment for this promoter, namely we measured the expression response to AM and PWM with a 7.5 min period. Model fitting was performed as described above. Experimental results and fits are shown in **Supplementary Fig. 6**. We found that the fit to the PWM experiment with a 7.5 min period was worse for the 2xBS-CYC180 than for the 5xBS-CYC180 promoter (**Supplementary Fig. 6**). In contrast, the response to PWM with a 30 min period was predicted well by the model for both promoters (**Fig. 2b, Supplementary Fig. 7**). These results could indicate promoter-dependent differences in the expression response to short (and possibly low amplitude) TF pulses that cannot be recapitulated by the simple gene expression model. Such differences have been previously observed for natural promoters<sup>3</sup>.

## Estimating nascent RNA accumulation

Single-molecule FISH (smFISH) allows for the quantification of nascent transcripts, which is a fast readout of VP-EL222's transcriptional activity. We performed an smFISH experiment in which we measure the transcriptional response of 5xBS-CYC180pr to a 20 min light pulse (**Supplementary Fig. 3**). To evaluate whether the identified model parameters describing VP-EL222 activity and the transcription process are consistent with this data, we introduce an ODE describing nascent RNA accumulation:

$$(4) \frac{dN_{ascent}}{dt} = k_{basal} + k_{max} \cdot \frac{TF_{on}^n}{K_d^n + TF_{on}^n} - k_{esc} \cdot N_{ascent}$$

Here, TF-dependent nascent RNA production is modeled using Hill-type kinetics with the same parametrization as for mRNA production (**Equation 2, Supplementary Table 4**). The rate at which a nascent RNA escapes from the transcription site ( $k_{esc}$ ) is given by the RNA dwell-time which includes elongation and termination, leading to  $k_{esc} = (\text{elongation time})^{-1} + (\text{termination time})^{-1}$ . The termination time was set to the literature value of 70 seconds<sup>4</sup> and the elongation time was set to 100 seconds based on the transcript length of 2000 bases and an average elongation rate of 20 bases per second<sup>4</sup>. We found that the predicted dynamics of nascent RNA accumulation closely resemble the experimental data (**Supplementary Fig. 3c**). We note that this model is very simplistic - it does for example assume that nascent RNAs are observable (via smFISH) directly after transcription initiation.



## **Supplementary Note 2. Using the ODE model to analyze functional regimes for PWM**

The goal of PWM in this study is to regulate TF activity in a pulsatile fashion, while leading to close to constant protein levels over time at steady state. We used the mathematical model to analyze how these properties are affected by different parameters, mainly  $k_{\text{off}}$ ,  $k_{\text{degP}}$ , and the PWM period. In order to ensure that we are not analyzing transient model behavior, all metrics described below were calculated after running the model for a simulated time of 720 min.

Effects of pulsatile TF regulation via PWM can be expected to be most pronounced when the concentration of active TF directly follows the light input, meaning that cellular TF activity itself shows either the maximal desired value or its basal level at any given time. However, in every realistic scenario, the temporal TF activity will deviate from this behavior to an extent that depends on the kinetics of TF activation / deactivation as well as the PWM period. We hence analyzed how the PWM period and the TF deactivation rate ( $k_{\text{off}}$ ) affect TF pulsing. In order to quantify this behavior, we use a tracking score defined by the ratio between the integrated TF activity during the light pulse and the whole period (**Fig. 1f**). This metric is 1 if the TF activity perfectly tracks the input and equals the duty-cycle if TF activity does not change over the PWM period. We calculated values of this metric for a duty cycle of 50% (**Fig. 1f**). As expected, the model shows that longer PWM periods are required with decreasing  $k_{\text{off}}$  to achieve a similar tracking score. The model further shows that the inferred rate of  $k_{\text{off}}$  for VP-EL222 ( $0.34 \text{ min}^{-1}$ , equivalent to a on-state half-life of about 2 min) is sufficiently large for performing PWM with reasonable periods. For a period of 30 min cellular TF activity is predicted to be at its maximal level during much of the light pulse and to return to basal levels in the dark before the next pulse (**Fig. 1f**). In contrast, when the period is reduced to 7.5 min, TF activity is predicted to reach its maximal activity before the end of the light pulse and to not return to the basal level in the dark (**Fig. 1f**). This leads effectively to gene regulation via mixed contributions of constant TF activity and weak pulsing. We found experimentally that this difference has strong functional consequences for the ability to use PWM for gene co-regulation (**Fig. 2d, Supplementary Fig. 8**) and noise reduction (**Fig. 3a,e**).

The model shows that pulsatile TF regulation can be more easily achieved with long PWM periods. However, using long PWM periods to regulate gene expression can potentially result in significant temporal fluctuation on the protein level, which is often not desirable. We thus sought to quantify the temporal response of protein expression to PWM. We use a score defined by the ratio of the maximal expression difference during the period divided by the mean expression level (**Fig. 1g**). Using this score, we found that even for a 30 min period, temporal changes in protein expression at steady state are expected to be minor for a wide range of protein half-lives (**Fig. 1g**). We confirmed experimentally that there is no measurable input tracking for a stable fluorescent protein (**Fig. 1g**). For the median protein half-life of  $\approx 40$  min in *S. cerevisiae*<sup>5</sup>, PWM is predicted to lead to a maximal temporal fluctuation of about 6% for a 10% duty cycle. We show experimentally that there is indeed relatively low input tracking for a destabilized fluorescent protein with a half-life of  $\approx 30$  min (or 23 min if dilution by cell growth is included) (**Fig. 1g, Supplementary Fig. 4a**). We note that the expected fluctuations are also affected by the mRNA degradation rate. Parameter

estimation resulted in a value of 16.5 min for the mRNA half-life, which is close to the median half-life in *S. cerevisiae* (10 - 20 min)<sup>6,7</sup>. Thus, modeling suggests that VP-EL222 should enable PWM-based regulation of a large percentage of yeast proteins. For very short-lived proteins, the system would need to be optimized by introducing mutations that increase the dark-reversion rate. Such mutations were identified previously<sup>8</sup>. We further note that VP-EL222 was previously employed in higher eukaryotes<sup>9</sup>, where both mRNA and protein degradation rates were measured to be significantly lower than in *S. cerevisiae*<sup>10,11</sup>. It is thus likely that PWM can be very successfully applied in these organisms and that PWM should also be possible with other tools for gene expression regulation that work on longer time-scales.

### **Supplementary Note 3: Modeling the effects of VP-EL222 variability**

Previous studies suggest that two major sources of extrinsic gene expression variability in *S. cerevisiae* are heterogeneity in TF expression and the cell cycle<sup>12,13</sup>. Due to the fact that we directly affect TF dynamics, we thought to introduce cell-to-cell variability in TF concentration to our model and analyze the resulting CV-mean relationship for AM and PWM. As performed in other studies<sup>14</sup>, we modeled protein / TF variability by running 10,000 ODE simulations differing only in the value for  $TF_{tot}$  for each input condition (consequences of this modeling choice are described below). Here, each simulation represents a single cell.

To do so, we first measured the fluorescence distribution of mCitrine tagged VP-EL222 to estimate heterogeneity of TF expression. We find that this distribution can be well described by a log-normal distribution with a CV of roughly 0.2 (**Supplementary Fig. 11a**). We then drew values for  $TF_{tot}$  from a log-normal distribution with a CV of 0.2 and a mean value of 2000 (the  $TF_{tot}$  value used for parameter estimation) and ran ODE simulations for a simulated time of 360 min. We ran simulations for different types of inputs (AM, and PWM with a 7.5, 15, and 30 min period) and different promoters (5xBS-CYC180pr and 2xBS-CYC180pr). Results of these simulations are shown in **Fig. 3e** and **Supplementary Fig. 11b**.

We found that the model can qualitatively recapitulate the CV-mean relationship for gene expression regulated by both AM and PWM. It also recapitulates the tunability of gene expression variability by changes in PWM period (see also **Fig. 3f**). In addition, the model predicts a reduced noise attenuation by PWM for the 2xBS-CYC180pr compared to the 5xBS-CYC180pr, which is verified by our experimental results (**Supplementary Fig. 11b,c**). This result shows the importance of working with “promoter-saturating-inputs” for maximal noise reduction by PWM (see **Fig. 3d,f** for an illustration and **Fig. 2b** for input-output functions for both promoters).

However, quantitatively, the model overestimated cell-to-cell variability in gene expression. This is likely a consequence of the model assumption that the TF concentration is fixed in each cell over the 6 h experiment. Indeed, when we compare the simulation results to measurements taken after 2 h of induction (**Supplementary Fig. 11d**), we find a better quantitative agreement. Furthermore, the model does not take into account intrinsic variability which is non-negligible at lower induction levels (**Fig. 3b,c**). We thus expect quantitative and qualitative differences between the model and the data for low expression levels, which can be seen in **Supplementary Fig. 11b,c**. To account for these shortcomings of the ODE modeling approach, we extended the modeling efforts by performing stochastic simulation and found that a simple stochastic model can quantitatively reproduce the observed cell-to-cell variability (see **Supplementary Note 4**).

## **Supplementary Note 4: Stochastic Modeling of VP-EL222 mediated expression**

As stated in **Supplementary Note 3**, the approach to modeling expression variability by changing initial conditions / the concentration VP-EL222 molecules per cell is highly simplistic and does not allow for a quantitative description of the experimental results due to two main shortcomings. First, we assumed that cellular VP-EL222 expression stays constant over the experimental time-scale of 6h, leading to an overestimation of expression variability. Second, while extrinsic variability is dominant for intermediate to high expression levels, we found substantial intrinsic variability as well as PWM mediated variability reduction at low expression levels (**Fig. 3b**). We thus sought to investigate whether a slightly more detailed, stochastic model can quantitatively recapitulate the experimentally observed expression variability. In the following sections, details on the modeling approach are presented.

### **Calibration of protein copy numbers using a standard curve**

In contrast to ODE simulations, the behaviour of stochastic models can be highly dependent on the actual copy number values of molecular species. We thus sought to estimate the average cellular protein copy-numbers of (mCitrine-labeled-)VP-EL222 and the reporter proteins expressed from VP-EL222 activated promoters. Following the approach of Zechner *et al.*<sup>15</sup>, we tagged multiple proteins genomically with the mCitrine FP (chosen over mKate2 due to its fast maturation rate) and used the resulting strains to construct a calibration curve that maps arbitrary fluorescent values to protein copy numbers per cell. We selected proteins with measured / estimated copy numbers per cell ranging from 5,000 to 100,000 proteins based on the unified protein abundance dataset presented in ref. 16. Selected proteins and their copy numbers are summarized in **Supplementary Table 5**. To obtain the calibration curve, cells were grown in SD-medium overnight, diluted to an OD<sub>700</sub> of 0.01 and grown for 6 h before cellular fluorescence was measured using flow cytometry. The fluorescent value obtained for the wild-type BY4741 strain was subtracted from the fluorescence values of the reference strains and a mapping between average protein copy numbers and measured average fluorescence was established by fitting a zero-intercept linear regression model (**Supplementary Fig. 13a**).

The fluorescence of a strain expressing mCitrine-labeled VP-EL222 under the control of the *ACT1* promoter (DBY105) was measured under the same conditions as the reference strains, leading to an estimate of average VP-EL222 copy number of  $\approx 12,300$  proteins per cell. We further measured the mCitrine fluorescence of a dual color reporter strain (DBY110, expressing both mCitrine and mKate2 under control of the 5xBS-CYC180 promoter) after blue light illumination ( $420 \mu\text{W cm}^{-2}$ ) for 6 h, which resulted in an estimate of average reporter copy number of  $\approx 370,000$  proteins per cell.

### **Modeling of VP-EL222 expression**

In order to model dynamic changes in VP-EL222 concentration, we assume that the temporal evolution of VP-EL222 and the resulting cell-to-cell variability results from intrinsic transcriptional dynamics. Given that several constitutively expressed genes in *S. cerevisiae* were shown to be transcribed in uncorrelated single transcription events<sup>4,17</sup>, we describe

VP-EL222 expression and activation using the following reaction, where I denotes the light input:

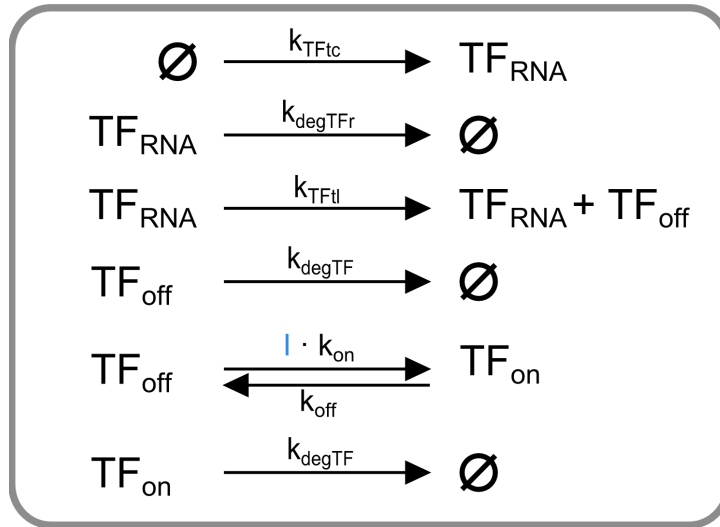

VP-EL222 expression is characterized by four parameter, namely the transcription rate ( $k_{TFtc}$ ), the translation rate ( $k_{TFtl}$ ) and mRNA and protein degradation rates ( $k_{degTFr}$  and  $k_{degTF}$ ). We found that the (mCitrine-labeled-)VP-EL222 protein is stable in *S. cerevisiae* and  $k_{degTF}$  was thus set to the cellular growth rate of  $0.007 \text{ min}^{-1}$ .  $k_{degTFr}$  was set to  $0.063 \text{ min}^{-1}$  based on a literature value regarding the half-life of mRNAs with the same terminator sequence<sup>18</sup>. Having these parameters fixed,  $k_{TFtl}$  and  $k_{TFtc}$  can be calculated based on the VP-EL222 copy number mean ( $\langle TF \rangle$ , see ‘Calibration of protein copy numbers using a standard curve’) and variance ( $\sigma_{TF}^2$ , see **Supplementary Fig. 11a**) using the following equations<sup>19</sup>:

$$k_{TFtl} = (k_{degTF} + k_{degTFr}) \cdot \left( \frac{\sigma_{TF}^2}{\langle TF \rangle} - 1 \right)$$

$$k_{TFtc} = \frac{\langle TF \rangle \cdot k_{degTFr} \cdot k_{degTF}}{\left( 1 - \frac{\sigma_{TF}^2}{\langle TF \rangle} \right) \cdot (k_{degTFr} + k_{degTF})}$$

This results in  $k_{TFtl} = 32.6359 \text{ min}^{-1}$  and  $k_{TFtc} = 0.1660 \text{ min}^{-1}$ . In order to model VP-EL222 expression in the diploid dual color reporter strain (DBY110) which expresses VP-EL222 from two identical copies, the rate  $k_{TFtc}$  was doubled. **Supplementary Fig. 13b** shows simulated single cell traces showing temporal changes in VP-EL222 protein copy.

### Modeling of reporter gene expression

We recently found that VP-EL222 mediated transcription occurs in bursts whose timing as well as duration are affected by VP-EL222 activity<sup>20</sup>. Thus, we modeled reporter gene transcription based on a two-state promoter model<sup>21</sup>, with VP-EL222 activity positively regulating promoter activation (switching from a repressed to a transcription competent state) and negatively regulating promoter deactivation. We compared this model to a

standard transcription-translation model in which the transcription rate directly depends on active VP-EL222 concentration (copy number per cell). The models consist of the following reactions:

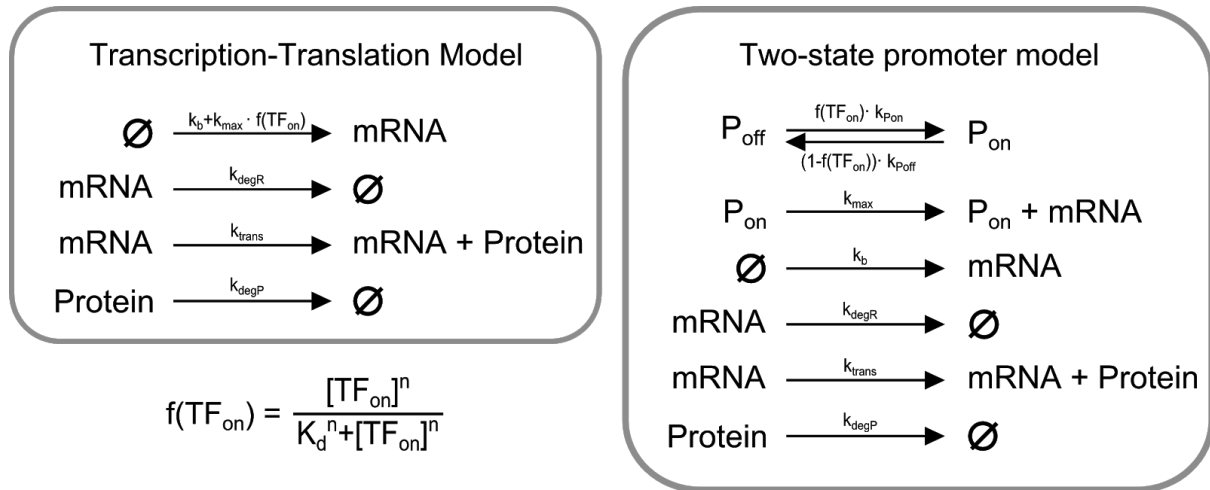

To achieve an input-output behaviour comparable to our experimental data, the dependence of transcription and promoter switching on active VP-EL222 concentration was modeled using a hill equations with parameters derived from the fitted ODE model (**Supplementary Note 1**).  $K_d$  was adjusted according to VP-EL222 mean copy numbers in the stochastic model.

In order to model the dual color reporter experiment, we simulate the response of two identical but independent promoters/reporters. In order to decompose intrinsic and extrinsic contributions to gene expression variability, the variability decomposition procedure<sup>22</sup> was applied to the simulated data as described in the Methods section for the experimental data. For all simulation, TF expression (see above) was first simulated for 600 min to reach steady state, before simulating the actual light induction experiments.

In order to bring into agreement the measured reporter protein copy numbers (see above) and the output of the two-state promoter model, we used parameters derived from the ODE model and solely adjusted the translation rate  $k_{\text{trans}}$ , which resulted in a good fit to the experimental data (**Fig. 4b**). For the the transcription-translation model, we analyzed multiple combinations of transcription rate ( $k_{\text{basal}}$  and  $k_{\text{max}}$ ) and translation rate ( $k_{\text{trans}}$ ) (**Supplementary Fig. 13 c,d**). All other model parameters are derived from the ODE model fits (**Supplementary Note 1**). Parameter values used for all simulations are summarized in **Supplementary Table 6**.

In **Figure 4** and **Supplementary Fig. 13** the mean-CV relationship of protein expression resulting from model simulations was compared to cellular fluorescence data that was normalized by side-scatter measurements to reduce the influence of cell size (Methods). Fluorescence values were multiplied by a constant to bring experimental and modeling results to the same maximal value.

Due to high copy numbers for the reporter protein, we used a hybrid model approach in which reporter protein translation and degradation was simulated using an ODE and all other reactions were simulated using the stochastic simulation algorithm (SSA)<sup>23</sup>. We used a custom implementation (provided by Jan Mikelson, ETH Zürich) of the SSA simulation combined with a ODE solver (CVODE package for C++). Since the stochastic part does not depend on the continuous dynamics, the simulation performed the common SSA steps for the stochastic part and reinitialized the ODE solver after each reaction to compute the deterministic dynamics in between the stochastic reactions.

## Supplementary Note 5: DNA sequences

Details about the DNA constructs used in this study are described below. The color coding of the sequences corresponds to colors used in the preceding text.

### VP-EL222 constructs

#### pDB58; pDB116 / *ACT1*pr - VP-EL222 - *CYC1*term

pDB58 was used to construct yeast strains expressing VP-EL222 from the *LEU2* locus. It consists of the **ACT1 promoter**, the coding sequence for **NLS-VP16-EL222** (derived from pVP-EL222<sup>9</sup>) and the **CYC1 terminator** integrated into an integrative vector based on the pRS vector series. The same construct was integrated into the centromeric plasmid pRG215<sup>2</sup> to generate pDB116.

```
tctagagaagcgggtaagctgccacagcaattaatgcacaacatttaacctacattcttcttatcggatcgtcaaaacc  
cttaaaaagatatgcctcaccctaacaatattttccaattaaccctcaatatttctctgtcaccgccctctattttccattttctt  
cttaccgccacgcggttttttcttcaaatttttcttcttcttttctccacgctctgtgcataaataaataaacggttt  
tgaaaccaaacctgcctctctctctcttttgaaatattttgggtttgttgatccttctcccaatctctctgtttaatata  
attcattatatacgcctctcttttatcttcttttctctctctgtattcttctccccttctactcaaaccaagaagaaa  
aagaaaaggcaatctttgttaagaataggatcttctactacatcagcttttagattttcacgcttactgctttttcttcca  
agatcgaaaatttactgaattaacaactagtATGGGCCCTAAAAAGAAGCGTAAAGTCGCCCCCC  
GACCGATGTCAGCCTGGGGGACGAGCTCCACTTAGACGGCGAGGACGTGGCGATGG  
CGCATGCCGACGCGCTAGACGATTTCGATCTGGACATGTTGGGGGACGGGGATTCC  
CGGGTCCGGGATTTACCCCCACGACTCCGCCCCCTACGGCGCTCTGGATATGGCCG  
ACTTCGAGTTTGAGCAGATGTTTACCGATGCCCTTGGAATTGACGAGTACGGTGGGG  
AATTCGGGGCAGACGACACACGCGTTGAGGTGCAACCGCCGGCGCAGTGGGTCTC  
GACCTGATCGAGGCCAGCCGATCGCATCGGTCTGTCCGATCCGCGTCTCGCCGAC  
AATCCGCTGATCGCCATCAACCAGGCCTTACCGACCTGACCGGCTATTCCGAAGAA  
GAATGCGTCGGCCGCAATTGCCGATTCTGGCAGGTTCCGGCACCGAGCCGTGGCTG  
ACCGACAAGATCCGCCAAGGCGTGCGCGAGCACAAGCCGGTGTGGTTCGAGATCCT  
GAACTACAAGAAGGACGGCACGCCGTTCCGCAATGCCGTGCTCGTTGCACCGATCTA  
CGATGACGACGACGAGCTTCTTATTCTCGGCAGCCAGGTCAAGTCGACGACGA  
CCAGCCCAACATGGGCATGGCGCGCCGCGAACGCGCCGCGGAAATGCTCAAGACGC  
TGTCGCCGCGCCAGCTCGAGGTTACGACGCTGGTGGCATCGGGCTTGCGCAACAAG  
GAAGTGGCGGCCCGGCTCGGCCTGTCGGAGAAAACCGTCAAGATGCACCGCGGGCT  
GGTGTGAAAAGCTCAACCTGAAGACCAGTGCCGATCTGGTGCGCATTGCCGTCGA  
AGCCGGAATCTAActcgagacaggcccctttctttgtctatatcatgtaattagttatgtcacgcttacattcag  
ccctctccacatccgctctaaccgaaaaggaaggagttagacaacctgaagtctaggctcctatttttttaaatg  
ttatgtagtattaagaacgttatttattttcaaattttctttttctgtacaaacgcgtgtacgcatgtaacattatactgaa  
aacctgttgagaaggtttgggacgctcgaaggcttaatttgaaggttcgcagtttactctcatcgtcgtctcat  
catcgttccggtgtgttttcttagtagcgtctgcttggtacc
```



pDB113; pDB131 / mCitrine-VP-EL222

In order to quantify VP-EL222 expression in single cells, a coding sequence for **mCitrine**<sup>24</sup> was inserted upstream of VP-EL222. All other aspects of the sequence are as described above for pDB58 / pDB116

actagtATG**GTAAGTAAGGGTGAAGAATTATTC**ACTGGTGTG**TCCCAATTTTGGTTGAA**  
TTAGATGGT**GATGTTAATGGTCACAAATTTTCTGTCTCCGGTGAAGGTGAAGGTGATG**  
CTACTTACGGTAAATT**GACCTTAAAATTTATTTG**ACTACTGGTAAATT**GCCAGTTCCA**  
TGGCCAACCTTAGTCACTACTTTAGGTTATGGTTT**GATGTGTTTTGCTAGATACCCAGA**  
TCATATGAAACAACATGACTTTTTCAAGTCTGCCATGCCAGAAAGGTTATGTTCAAGAA  
AGAACTATTTTTTCAAAGATGACGGTAACTACAAGACCAGAGCTGAAGTCAAGTTT**G**  
AAGGTGATACCTTAGTTAATAGAATCGAATTA**AAAAGGTATTGATTTTAAAGAAGATGG**  
TAACATTTTAGGTCACAAATTGGAATACA**ACTATAACTCTCACAATGTTTACATCATGG**  
CTGACAAACAAAAGAATGGTATCAAAGTTAACTTCAA**AAATTAGACACAACATTGAAGA**  
TGTTTCTGTTCAATTAGCTGACCATTATCAACAAA**ATACTCCAATTGGTGATGGTCCA**  
GTCTTGTTACCAGACAACCATTACTTATCCTATCAATCTAAGTTATCCAAAGATCCAAA  
CGAAAAGAGAGACCACATGGTCTTGTTAGAATTTGTTACTGCTGCTGGTATTACCCAT  
GGAATGGACGAATTGTACAAAGGC**CCTAAAAGAAGCGTAAAGTCGCCCCCCGAC**  
CGATGTCAGCCTGGGGGACGAGCTCCACTTAGACGGCGAGGACGTGGCGATGGCGC  
ATGCCGACGCGCTAGACGATTT**CGATCTGGACATGTTGGGGGACGGGGATTCCCCGG**  
GTCCGGGATTTACCCCCACGACTCCGCCCCCTACGGCGCTCTGGATATGGCCGACT  
TCGAGTTTGAGCAGATGTTTACCGATGCCCTT**GGAATTGACGAGTACGGTGGGGAATT**  
CGGGGCAGACGACACACGCGTTGAGGTGCAACC**GCCGGCGCAGTGGGTCCTCGACC**  
TGATCGAGGCCAGCCGATCGCATCGGT**CGTGTCCGATCCGCGTCTCGCCGACAATC**  
CGCTGATCGCCATCAACCAGGCCTT**CACCGACCTGACCGGCTATTCCGAAGAAGAAT**  
GCGTCGGCCGCAATTGCCGATT**CCTGGCAGGTTCCGGCACCGAGCCGTGGCTGACC**  
GACAAGATCCGCCAAGGCGTGCGCGAGCACAAGCCGGT**GCTGGTCGAGATCCTGAA**  
CTACAAGAAGGACGGCACGCGTTCCGCAATGCCGT**GCTCGTTGCACCGATCTACGA**  
TGACGACGACGAGCTTCTTATTT**CCTCGGCAGCCAGGT**CGAAGTCGACGACGACCA  
GCCCAACATGGGCATGGCGCGCCGCGAACGCGCCGCGGAAAT**GCTCAAGACGCTGT**  
CGCCGCGCCAGCTCGAGGTTACGACGCTGGTGGC**ATCGGGCTTGC**GCAACAAGGAA  
GTGGCGGCCCGGCTCGGCCTGTCGGAGAAAACC**GTCAAGATGCACCGCGGGCTGGT**  
GATGAAAAGCTCAACCTGAAGACCAGTGCCGATCTGGT**GCGCATTGCCGTCGAAGC**  
CGGAATCTAActcgag

## VP-EL222 - dependent promoter sequences / reporter constructs

For all following promoter sequences, EL222 binding sites (BS; called C120 in the original publication) are underlined and promoter backbones are green. A sequence containing 5 binding sites for EL222 was amplified from pcDNA-C120-mCherry<sup>9</sup>. All other binding site combinations were constructed by oligonucleotide annealing to obtain a single plasmid containing a single EL222 binding site, followed by duplications of this sequence using restriction enzyme cloning.

### **pDB60 / 5xBS-CYC180pr-Kozak-mKate2-ADH1t**

pDB60 is used to express **mKate2**<sup>25</sup> under control of the 5xBS-CYC180 promoter. The promoter consists of a sequence containing 5 EL222 binding sites as well as a 180 bp sequence derived from the *CYC1* promoter (**CYC180**). *CYC180* was amplified from BY4741 genomic DNA<sup>26</sup>. A consensus **Kozak** sequence was inserted upstream of the start codon to enhance translation. The mKate2 reporter gene is inserted into pFA6a-*His3MX6*<sup>27</sup> using *PacI* and *Ascl* sites (upstream of the **ADH1 terminator**). 5xBS-CYC180pr is inserted using *HindIII* and *PacI*.

All other VP-EL222 dependent promoters (see below) were characterized using the same plasmid backbone and were integrated into *HindIII/PacI* digested plasmid.

aagcttGGGAGATCTTCGCTAGCCTCGAGTAGGTAGCCTTTAGTCCATGCGTTATAGGTA  
GCCTTTAGTCCATGCGTTATAGGTAGCCTTTAGTCCATGCGTTATAGGTAGCCTTTAGT  
CCATGCGTTATAGGTAGCCTTTAGTCCATGAAGCTTAGACACTAGAGGGACTAGAGT  
GCTGACACTACAGGCATATATATATGTGTGCGACGACACATGATCATATGGCATGCAT  
GTGCTCTGTATGTATATAAACTCTTGTCTTTCTTTCTCTAAATATTCTTTCTTATA  
CATTAGGACCTTTCGAGCATAAATTACTATACTTCTATAGACACACAAACACAAATAC  
Attaattaa**AACA**AAATGAGATCTGTTTCTGAATTGATTAAGAAAACATGCATATGAAGT  
TGTATATGGAAGGTACTGTTAACAATCATCATTCAAGTGTACATCTGAAGGTGAAGG  
TAAACCATATGAAGGTACTCAAACATGAGAATTAAGCTGTTGAAGGTGGTCCATTG  
CCATTTGCTTTTGATATTTTGGCTACTTCTTTCATGTATGGTTCTAAGACTTTCATTAAC  
CATACTCAAGGTATTCCAGATTTTTTCAAGCAATCTTTCCAGAAGGTTTACTTGGGA  
AAGAGTTACTACTTACGAAGATGGTGGTGTGTTTACTGCTACTCAAGATACTTCTTTCG  
AAGATGGTTGTTTGAATTTACAACGTTAAGATTAGAGGTGTTAATTTCCATCTAATGGT  
CCAGTTATGCAAAAAAGACTTTGGGTTGGGAAGCATCTACTGAAACTTTGTATCCAG  
CTGATGGTGGTTTGAAGGTAGAGCTGATATGGCTTTGAAATTGTTGGTGGTGGTCA  
TTTGATTTGTAACCTGAAAACACTTACAGATCAAAAAAGCCAGCTAAGAATTTGAAA  
ATGCCAGGTGTTTATTACGTTGATAGAAGATTGGAAAGAATTAAGAAGCTGATAAAG  
AAACTTACGTTGAACAACATGAAGTTGCTGTTGCAAGATATTGTGATTTGCCATCTAA  
ATTGGGTCATAGAGGATCCTAG**ggcgcgccacttctaaataagcgaatttctatgatttatgattttattatta**  
**aataagttataaaaaaataagtgatacaaatTTAAAGTgactcttaggtttaaaacgaaaattcttattcttgagtaact**  
**cttctctgtaggtcaggttgcttctcaggtatagtagggtcgccttattgaccacacctctaccggca**

### pDB72 / 5xBS-GAL1pr

The design of the VP-EL222 dependent *GAL1*-based promoter is adapted from another synthetic gene expression system presented in ref. 28. The promoter was constructed by exchanging the UAS-GAL region (containing Gal4p binding sites) of the *GAL1* promoter with the 5xBS sequence from pcDNA-C120-mCherry<sup>9</sup>.

```
aagcttTTTAATTATATCAGTTATTACCCGGTACCCCCCTCGAGGAATTTTCAAAAATTCT
TACTTTTTTTTTGGATGGACGCAAAGAAGTTTAATAATCATATTACATGGCATTACCAC
CATATACATATCCATATACATATCCATATCTAATCTTACTTATATGTTGTGGAAATGTAA
AGAGCCCCATTATCTTAGCCTAAAAAACCTTCTCTTTGGAACCTTCAGTAATACGCTT
AACTGCTCATTGCTATATTGAAGTGCGGCCGCGGGAGATCTTCGCTAGCCTCGAGTA
GGTAGCCTTTAGTCCATGCGTTATAGGTAGCCTTTAGTCCATGCGTTATAGGTAGCCT
TTAGTCCATGCGTTATAGGTAGCCTTTAGTCCATGCGTTATAGGTAGCCTTTAGTCCAT
GAAGCTTAGACACTAGAGGGACTAGACCGTGCGTCCTCGTCTTCACCGGTCGCGTTC
CTGAAACGCAGATGTGCCTCGCGCCGCACTGCTCCGAACAATAAAGATTCTACAATA
CTAGCTTTTATGGTTATGAAGAGGAAAAATTGGCAGTAACCTGGCCCCACAAACCTTC
AAATGAACGAATCAAATTAACAACCATAGGATGATAATGCGATTAGTTTTTTAGCCTT
ATTTCTGGGGTAATTAATCAGCGAAGCGATGATTTTTGATCTATTAACAGATATATAAA
TGCAAAAACCTGCATAACCACTTTAACTAATACTTTCAACATTTTCGGTTTGTACTTTC
TTATTCAAATGTAATAAAAAGTATCAACAAAAAATTGTTAATATACCTCTATACTTTAAC
GTCAAGGAGAAAAAATAA
```

### pDB107 / 5xBS-SPO13pr

In order to achieve light-dependant gene expression with very low basal expression, we inserted EL222 binding sites upstream of the basal *SPO13* promoter<sup>29</sup>. The *SPO13* promoter sequence was amplified from BY4741 genomic DNA.

```
aagcttGGGAGATCTTCGCTAGCCTCGAGTAGGTAGCCTTTAGTCCATGCGTTATAGGTA
GCCTTTAGTCCATGCGTTATAGGTAGCCTTTAGTCCATGCGTTATAGGTAGCCTTTAGT
CCATGCGTTATAGGTAGCCTTTAGTCCATGAAGCTTAGACACTAGAGGGACTAGATTT
AGTATCCGTTTAGCTAGTTAGTACCTTTGCACGGAAATGTATTAATTAGGAGTATATTG
AGAAATAGCCGCCGACAAAAAGGAAGTCTCATAAAAGTGTCTAACAGACAATTAGCG
CAATAAGAAGAAAGAAAACGGATTGAAGTTGAGTCGAGAATAATT
```

### pDB67 / 1xBS-CYC180pr

```
aagcttGCGGCCGCTTCTAGATAGGTAGCCTTTAGTCCATGACTAGAGTGCTGACACTA
CAGGCATATATATATGTGTGCGACGACACATGATCATATGGCATGCATGTGCTCTGTA
TGTATATAAACTCTTGTCTTCTTTCTCTAAATATTCTTTCTTATAACATTAGGACC
TTTGCAGCATAAATACTATACTTCTATAGACACACAAACACAAATAC
```

pDB99 / 2xBS-CYC180pr

aagcttAGCTTGC GTTCGCTACTAGTAGCTAGCCTTTAGTCCATGTCTAGTAGCTAGCCT  
TTAGTCCATGTCTAGAGTGCTGACACTACAGGCATATATATATGTGTGCGACGACACA  
TGATCATATGGCATGCATGTGCTCTGTATGTATATAAAACTCTTGTTTTCTTCTTTTCTC  
TAAATATTCTTTCTTATACATTAGGACCTTTGCAGCATAAATTACTATACTTCTATAGA  
CACACAAACACAAATACAttaattaa

pDB100 / 3xBS-CYC180pr

aagcttAGCTTGC GTTCGCTACTAGTAGCTAGCCTTTAGTCCATGTCTAGTAGCTAGCCT  
TTAGTCCATGTCTAGTAGCTAGCCTTTAGTCCATGTCTAGAGTGCTGACACTACAGGC  
ATATATATATGTGTGCGACGACACATGATCATATGGCATGCATGTGCTCTGTATGTAT  
ATAAAACTCTTGTTTTCTTCTTTTCTCTAAATATTCTTTCTTATAACATTAGGACCTTTGC  
AGCATAAATTACTATACTTCTATAGACACACAAACACAAATACAttaattaa

pDB101 / 4xBS-CYC180pr

aagcttAGCTTGC GTTCGCTACTAGTAGCTAGCCTTTAGTCCATGTCTAGTAGCTAGCCT  
TTAGTCCATGTCTAGTAGCTAGCCTTTAGTCCATGTCTAGTAGCTAGCCTTTAGTCCAT  
GTCTAGAGTGCTGACACTACAGGCATATATATATGTGTGCGACGACACATGATCATAT  
GGCATGCATGTGCTCTGTATGTATATAAAACTCTTGTTTTCTTCTTTTCTCTAAATATTC  
TTTCTTATAACATTAGGACCTTTGCAGCATAAATTACTATACTTCTATAGACACACAAA  
CACAAATACAttaattaa

pDB102 / 6xBS-CYC180pr

aagcttAGCTTGC GTTCGCTACTAGTAGCTAGCCTTTAGTCCATGTCTAGTAGCTAGCCT  
TTAGTCCATGTCTAGTAGCTAGCCTTTAGTCCATGTCTAGTAGCTAGCCTTTAGTCCAT  
GTCTAGTAGCTAGCCTTTAGTCCATGTCTAGTAGCTAGCCTTTAGTCCATGTCTAGAGT  
GCTGACACTACAGGCATATATATATGTGTGCGACGACACATGATCATATGGCATGCAT  
GTGCTCTGTATGTATATAAAACTCTTGTTTTCTTCTTTTCTCTAAATATTCTTTCTTATA  
CATTAGGACCTTTGCAGCATAAATTACTATACTTCTATAGACACACAAACACAAATAC  
Attaattaa

pDB103 / TDH3pr

aagcttTCAGTTCGAGTTTATCATTATCAATACTGCCATTTCAAAGAATACGTAAATAATT  
AATAGTAGTGAATTTTCTAACTTTATTTAGTCAAAAAATTAGCCTTTTAATTCTGCTGTA  
ACCCGTACATGCCCAAATAGGGGGCGGGTTACACAGAATATATAACATCGTAGGTG  
TCTGGGTGAACAGTTTATTCCTGGCATCCACTAAATATAATGGAGCCCGCTTTTAAAG

CTGGCATCCAGAAAAAAAAAGAATCCAGCACCAAATATTGTTTTCTTCACCAACCA  
TCAGTTCATAGGTCCATTCTCTTAGCGCAACTACAGAGAACAGGGGCACAAACAGGC  
AAAAACGGGCACAACCTCAATGGAGTGATGCAACCTGCCTGGAGTAAATGATGACA  
CAAGGCAATTGACCCACGCATGTATCTATCTCATTCTTACACCTTCTATTACCTTCT  
GCTCTCTCTGATTTGGAAAAAGCTGAAAAAAAAAGGTTGAAACCAGTTCCTGAAATTA  
TTCCCCTACTTGACTAATAAGTATATAAAGACGGTAGGTATTGATTGTAATTCTGTAAA  
TCTATTTCTTAAACTTCTTAAATTCTACTTTTATAGTTAGTCTTTTTTTTAGTTTTAAAC  
ACCAAGAACTTAGTTTCGAATAAACACACATAAACAAACAAAAttaattaa

### Further sequences expressed from VP-EL222 dependent promoters

As shown above for mKate2 in pDB60, all sequences were integrated into PacI, Ascl digested pFA6a-*His3MX6*-derived plasmids. Furthermore, all sequences possess a Kozak consensus sequence directly upstream of the start codon.

### **pDB78 / mKate2 - 24xPP7SL**

A sequence containing 24 tandem repeats of the **PP7 stem loop** was amplified from pDZ416<sup>30</sup> and was inserted after the mKate2 stop codon.

ttaattaa**AACAAA**ATGAGATCTGTTTCTGAATTGATTAAGAAAACATGCATATGAAGTT  
GTATATGGAAGGTAAGTACTGTTAACAATCATCATTTCAGGTGTACATCTGAAGGTGAAGGT  
AAACCATATGAAGGTAAGTACTCAAACATGAGAATTAAGCTGTTGAAGGTGGTCCATTGC  
CATTGCTTTTGATATTTGGCTACTTCTTTCATGTATGGTTCTAAGACTTTCATTAACC  
ATACTCAAGGTATCCAGATTTTTTCAAGCAATCTTTTCCAGAAGGTTTTACTTGGGAA  
AGAGTTACTACTTACGAAGATGGTGGTGGTTTACTGCTACTCAAGATACTTCTTTGCA  
AGATGGTTGTTGATTTACAACGTTAAGATTAGAGGTGTTAATTTTCCATCTAATGGTC  
CAGTTATGCAAAAAAAGACTTTGGGTTGGGAAGCATCTACTGAAACTTTGTATCCAGC  
TGATGGTGGTTTGAAGGTAGAGCTGATATGGCTTTGAAATTGGTTGGTGGTGGTCAT  
TTGATTTGTAACCTGAAAACACTTACAGATCAAAAAAGCCAGCTAAGAATTTGAAAA  
TGCCAGGTGTTTATTACGTTGATAGAAGATTGAAAGAATTAAGAAGCTGATAAAGA  
AACTTACGTTGAACAACATGAAGTTGCTGTTGCAAGATATTGTGATTTGCCATCTAAAT  
TGGGTCATAGAGGATCCtaagggtacctaattgcctagaaaggagcagacgatatggcgtcgcctcctgcag  
gtcgcactctagaaaccagcagagcatatgggctcgcctgctgcaggtcgcactctagaaaccagcagagcatatgggctc  
ttgcctagaaaggagcagacgatatggcgtcgcctcctgcaggtcgcactctagaaaccagcagagcatatgggctc  
ctggctgcaggtcgcactctagaaaccagcagagcatatgggctcgcctgctgcaggtcgcactctagaaaccagcagagcata  
cctgcaggtcgcactctagaaaccagcagagcatatgggctcgcctgctgcaggtcgcactctagaaaccagcagagcata  
gtacctaattgcctagaaaggagcagacgatatggcgtcgcctcctgcaggtcgcactctagaaaccagcagagcata  
tgggctcgcctgctgcaggtcgcactctagaaaccagcagagcatatgggctcgcctgctgcaggtcgcactctagaaaccagc  
cgtcgcctcctgcaggtcgcactctagaaaccagcagagcatatgggctcgcctgctgcaggtcgcactctagaaaccagc  
atcctaagggtacctaattgcctagaaaggagcagacgatatggcgtcgcctcctgcaggtcgcactctagaaaccagc  
gagcatatgggctcgcctgctgcaggtcgcactctagaaaccagcagagcatatgggctcgcctgctgcaggtcgcactctagaa  
gatatggcgtcgcctcctgcaggtcgcactctagaaaccagcagagcatatgggctcgcctgctgcaggtcgcactctagaa  
tcattagatcctaagggtacctaattgcctagaaaggagcagacgatatggcgtcgcctcctgcaggtcgcactctagaa

ccagcagagcatatgggctcgctggctgcagattcccgggttcattagatcctaaggtacctaattgcctagaaagga  
gcagacgatatggcgtcgctccctgcaggtcgactctagaaaccagcagagcatatgggctcgctggctgcagattc  
ccgggttcattagatcctaaggtacctaattgcctagaaaggagcagacgatatggcgtcgctccctgcaggtcgactc  
tagaaaccagcagagcatatgggctcgctggctgcagattcccgggttcattagatcctaaggtacctaattgcctag  
aaaggagcagacgatatggcgtcgctccctgcaggtcgactctagaaaccagcagagcatatgggctcgctggctg  
cagattcccgggttcattagatcctaaggtacctaattgcctagaaaggagcagacgatatggcgtcgctccctgcag  
gtcgactctagaaaccagcagagcatatgggctcgctggctgcagattcccgggttcattagatccccgggtgcg  
gcgcc

pDB110 / mCitrine

ttaattaa**AACAAA**ATGAAAGGTGAAGAATTATTCCTGGTGTGTCCCAATTTTGGTTGA  
ATTAGATGGTGTATGTTAATGGTCACAAATTTTCTGTCTCCGGTGAAGGTGAAGGTGAT  
GCTACTTACGGTAAATTGACCTTAAAATTTATTTGTACTACTGGTAAATTGCCAGTTCC  
ATGGCCAACCTTAGTCACTACTTTAGGTTATGGTTTGTATGTGTTTTGCTAGATACCCAG  
ATCATATGAAACAACATGACTTTTTCAAGTCTGCCATGCCAGAAGGTTATGTTCAAGA  
AAGAACTATTTTTTTCAAAGATGACGGTAACTACAAGACCAGAGCTGAAGTCAAGTTT  
GAAGGTGATACCTTAGTTAATAGAATCGAATTAAGGTATTGATTTAAAGAAGATG  
GTAACATTTTAGGTCACAAATTGGAATACAACATACTCTCACAATGTTTACATCATG  
GCTGACAAACAAAAGAATGGTATCAAAGTTAACTTCAAATTAGACACAACATTGAAG  
ATGGTTCTGTTCAATTAGCTGACCATTATCAACAAAATACTCCAATTGGTGTATGGTCCA  
GTCTTGTACCAGACAACCATTACTTATCCTATCAATCTAAGTTATCCAAAGATCCAAA  
CGAAAAGAGAGACCACATGGTCTTGTTAGAATTTGTTACTGCTGCTGGTATTACCCAT  
GGTATGGATGAATTGTACAAAaggcgcgcc

pDB150 / Destabilized Citrine (Citrine-*ADH1*tail)

The *ADH1* tail sequence <sup>1,2</sup> used for destabilization is highlighted in blue.

ttaattaa**AACAAA**ATGAGATCTAAAGGTGAAGAATTATTCCTGGTGTGTCCCAATTTT  
GGTTGAATTAGATGGTGTATGTTAATGGTCACAAATTTTCTGTCTCCGGTGAAGGTGAA  
GGTGTATGCTACTTACGGTAAATTGACCTTAAAATTTATTTGTACTACTGGTAAATTGCC  
AGTTCCATGGCCAACCTTAGTCACTACTTTAGGTTATGGTTTGTATGTGTTTTGCTAGAT  
ACCCAGATCATATGAAACAACATGACTTTTTCAAGTCTGCCATGCCAGAAGGTTATGT  
TCAAGAAAGAATACTATTTTTTTCAAAGATGACGGTAACTACAAGACCAGAGCTGAAGTC  
AAGTTTGAAGGTGATACCTTAGTTAATAGAATCGAATTAAGGTATTGATTTAAAGA  
AGATGGTAACATTTTAGGTCACAAATTGGAATACAACATACTCTCACAATGTTTACA  
TCATGGCTGACAAACAAAAGAATGGTATCAAAGTTAACTTCAAATTAGACACAACAT  
TGAAGATGGTTCTGTTCAATTAGCTGACCATTATCAACAAAATACTCCAATTGGTGTAT  
GGTCCAGTCTTGTTACCAGACAACCATTACTTATCCTATCAATCTAAGTTATCCAAAGA  
TCCAAACGAAAAGAGAGACCACATGGTCTTGTTAGAATTTGTTACTGCTGCTGGTATT  
ACCCATGGTATGGATGAATTGTACAACACTTGGTCTACTGTTAGAAGATCCGGTTTGG  
AACTCAATT**CAGAGCTTTGGACTTCTTCGCCAGAGGTTTGGTCAAGTCTCCAATCAA  
GTTGTCTGGCTTGTCTACCTTGCCAGAAATTTACGAAAAGATGGAAAAGGGTCAAATC  
GTTGGTAGATACGTTGTTGACACTTCTAAATAA**aggcgcgcc

pDB152 / mCitrine-URA3

The **URA3 coding sequence** was amplified from BY4741 genomic DNA. URA3 and mCitrine are separated by a **linker sequence**.

ttaattaa**AACAAA**ATGAAAGGTGAAGAATTATTCCTGGTGTGTCCTCAATTTTGGTTGA  
ATTAGATGGTGTGATGTTAATGGTCACAAATTTTCTGTCTCCGGTGAAGGTGAAGGTGAT  
GCTACTTACGGTAAATTGACCTTAAAATTTATTTGTACTACTGGTAAATTGCCAGTTCC  
ATGGCCAACCTTAGTCACTACTTTAGGTTATGGTTTGATGTGTTTTGCTAGATACCCAG  
ATCATATGAAACAACATGACTTTTTCAAGTCTGCCATGCCAGAAGGTTATGTTCAAGA  
AAGAACTATTTTTTTCAAAGATGACGGTAACTACAAGACCAGAGCTGAAGTCAAGTTT  
GAAGGTGATACCTTAGTTAATAGAATCGAATTTAAAGGTATTGATTTTAAAGAAGATG  
GTAACATTTTAGGTCACAAATTGGAATACAACATACTCTCACAATGTTTACATCATG  
GCTGACAAACAAAAGAATGGTATCAAAGTTAACTTCAAATTAGACACAACATTGAAG  
ATGGTTCTGTTCAATTAGCTGACCATTATCAACAAAATACTCCAATTGGTGTGATGGTCCA  
GTCTTGTTACCAGACAACCATTACTTATCCTATCAATCTAAGTTATCCAAAGATCCAAA  
CGAAAAGAGAGACCACATGGTCTTGTTAGAATTTGTTACTGCTGCTGGTATTACCCAT  
GGTATGGATGAATTGTACAAA**ggtgacggtgctggtttaataaac**ATGTGCGAAAGCTACATATA  
**AGGAACGTGCTGCTACTCATCCTAGTCTGTTGCTGCCAAGCTATTTAATATCATGCA**  
**CGAAAAGCAAACAACTTGTGTGCTTCATTGGATGTTTCGTACCACCAAGGAATTACTG**  
**GAGTTAGTTGAAGCATTAGGTCCCAAATTTGTTTACTAAAAACACATGTGGATATCTT**  
**GACTGATTTTTCCATGGAGGGCACAGTTAAGCCGCTAAAGGCATTATCCGCCAAGTA**  
**CAATTTTTTACTCTTCGAAGACAGAAAATTTGCTGACATTGGTAATACAGTCAAATTGC**  
**AGTACTCTGCGGGTGTATACAGAATAGCAGAATGGGCAGACATTACGAATGCACACG**  
**GTGTGGTGGGCCAGGTATTGTTAGCGGTTTGAAGCAGGCGGCGGAAGAAGTAACA**  
**AAGGAACCTAGAGGCCTTTTGTATGTTAGCAGAATTGTCATGCAAGGGCTCCCTAGCTA**  
**CTGGAGAATATACTAAGGGTACTGTTGACATTGCGAAGAGCGACAAAGATTTTGTAT**  
**CGGCTTTATTGCTCAAAGAGACATGGGTGGAAGAGATGAAGGTTACGATTGGTTGATT**  
**ATGACACCCGGTGTGGGTTTATGATGACAAGGGAGACGCATTGGGTCAACAGTATAGA**  
**ACCGTGGATGATGTGGTCTCTACAGGATCTGACATTATTATTGTTGGAAGAGGACTAT**  
**TTGCAAAGGGAAGGGATGCTAAGGTAGAGGGTGAACGTTACAGAAAAGCAGGCTGG**  
**GAAGCATATTTGAGAAGATGCGGCCAGCAAACTAAggcgcgcc**

## Supplementary Tables

**Supplementary Table 1.** Plasmids used for strain construction. Promoters are represented by “pr”, terminators are represented by “t”.

| Plasmid | Backbone             | Insert                                                        | Source     |
|---------|----------------------|---------------------------------------------------------------|------------|
| pDB58   | pKERG105             | <i>ACT1</i> pr-VPEL222-CYC1t                                  | this study |
| pDB60   | pFA6- <i>his3MX6</i> | 5xBS-CYC180pr-Kozak-mKate2- <i>ADH1</i> t                     | this study |
| pDB67   | pFA6- <i>his3MX6</i> | 1xBS-CYC180pr-Kozak-mKate2- <i>ADH1</i> t                     | this study |
| pDB72   | pFA6- <i>his3MX6</i> | 5xBS-GAL1pr-Kozak-mKate2- <i>ADH1</i> t                       | this study |
| pDB99   | pFA6- <i>his3MX6</i> | 2xBS-CYC180pr-Kozak-mKate2- <i>ADH1</i> t                     | this study |
| pDB100  | pFA6- <i>his3MX6</i> | 3xBS-CYC180pr-Kozak-mKate2- <i>ADH1</i> t                     | this study |
| pDB101  | pFA6- <i>his3MX6</i> | 4xBS-CYC180pr-Kozak-mKate2- <i>ADH1</i> t                     | this study |
| pDB102  | pFA6- <i>his3MX6</i> | 6xBS-CYC180pr-Kozak-mKate2- <i>ADH1</i> t                     | this study |
| pDB103  | pFA6- <i>his3MX6</i> | <i>TDH3</i> pr-Kozak-mKate2- <i>ADH1</i> t                    | this study |
| pDB107  | pFA6- <i>his3MX6</i> | 5xBS-SPO13pr-Kozak-mKate2- <i>ADH1</i> t                      | this study |
| pDB110  | pFA6- <i>his3MX6</i> | 5xBS-CYC180pr-Kozak-Citrine- <i>ADH1</i> t                    | this study |
| pDB113  | pKERG105             | <i>ACT1</i> pr-mCitrine-VPEL222-CYC1term                      | this study |
| pDB78   | pFA6- <i>his3MX6</i> | 5xBS-CYC180pr-Kozak-mKate2-24xPP7SL- <i>ADH1</i> t            | this study |
| pDB116  | pRG215               | <i>ACT1</i> pr-VPEL222-CYC1t                                  | this study |
| pDB131  | pRG215               | <i>ACT1</i> pr-mCitrine-VPEL222-CYC1t                         | this study |
| pDB150  | pFA6- <i>his3MX6</i> | 5xBS-CYC180pr-Kozak-mCitrine- <i>ADH1</i> tail- <i>ADH1</i> t | this study |
| pDB152  | pFA6- <i>his3MX6</i> | 5xBS-GAL1pr-Kozak-mCitrine-URA3-CYC1t                         | this study |



**Supplementary Table 2.** Strains used in this study. Promoters are represented by “pr”, terminators are represented by “t”.

| Name   | Genotype                                                                      | Source    | Data shown in Figure                            |
|--------|-------------------------------------------------------------------------------|-----------|-------------------------------------------------|
| BY4741 | MATa <i>his3Δ1 leu2Δ0 met15Δ0 ura3Δ0</i>                                      | Euroscarf | 1d; S1a                                         |
| BY4742 | MATalpha <i>his3Δ1 leu2Δ0 lys2Δ0 ura3Δ0</i>                                   | Euroscarf | -                                               |
| DBY41  | BY4741, <i>LEU2::ACT1pr-VPEL222-CYC1t</i> (pDB57)                             | this work | 1d; S1a; S5                                     |
| DBY42  | BY4742, <i>LEU2::ACT1pr-VPEL222-CYC1t</i> (pDB57)                             | this work | -                                               |
| DBY43  | DBY41, <i>his3Δ::5xBS-CYC180pr-Kozak-mKate2-ADH1t-HIS3MX</i> (pDB60)          | this work | 1d,g; 2b-d; 3a; 4e S1a; S5, S7; S8; S9; S11;S12 |
| DBY44  | DBY41, <i>his3Δ::5xBS-GAL1pr-Kozak-mKate2-ADH1t-HIS3MX</i> (pDB72)            | this work | 2a; S5; S8                                      |
| DBY45  | DBY41, <i>his3Δ::1xBS-CYC180pr-Kozak-mKate2-ADH1t-HIS3MX</i> (pDB60)          | this work | 2a; S5; S8                                      |
| DBY69  | DBY41, <i>his3Δ::2xBS-CYC180pr-Kozak-mKate2-ADH1t-HIS3MX</i> (pDB99)          | this work | 2a-d; S5; S6;S7;S8;S11                          |
| DBY70  | DBY41, <i>his3Δ::3xBS-CYC180pr-Kozak-mKate2-ADH1t-HIS3MX</i> (pDB100)         | this work | 2a; S5                                          |
| DBY71  | DBY41, <i>his3Δ::4xBS-CYC180pr-Kozak-mKate2-ADH1t-HIS3MX</i> (pDB101)         | this work | 2a; S5                                          |
| DBY72  | DBY41, <i>his3Δ::6xBS-CYC180pr-Kozak-mKate2-ADH1t-HIS3MX</i> (pDB102)         | this work | 2a; S5                                          |
| DBY122 | DBY41, <i>his3Δ::5xBS-SPO13pr-Kozak-mKate2-ADH1t-HIS3MX</i> (pDB107)          | this work | 2a; S5;S8                                       |
| DBY88  | DBY41, <i>his3Δ::5xBS-CYC180pr-Kozak-mKate2-24xPP7SL-ADH1t-HIS3MX</i> (pDB78) | this work | S3                                              |
| DBY73  | BY4741, <i>his3Δ::5xBS-CYC180pr-Kozak-mKate2-ADH1t-HIS3MX</i> (pDB60)         | this work | 1d                                              |
| DBY100 | DBY41, <i>his3Δ::TDH3pr-Kozak-mKate2-HIS3MX</i> (pDB103)                      | this work | S1c; S9a,b                                      |
| DBY104 | DBY42, <i>his3Δ::5xBS-CYC180pr-Kozak-Citrine-ADH1t-HIS3MX</i> (pDB110)        | this work | -                                               |
| DBY105 | DBY73, <i>LEU2::ACT1pr-mCitrine-VPEL222-CYC1t</i> (pDB113)                    | this work | 3g; S11                                         |
| DBY110 | MATa/MATalpha, DBY43/DBY104                                                   | this work | 3b,c; 4b,c; S10                                 |
| DBY112 | DBY73, <i>ACT1pr-VPEL222-CYC1t</i> (pDB116)                                   | this work | 3h; S12                                         |
| DBY118 | MATa/MATalpha, DBY69/DBY104                                                   | this work | S8a                                             |
| DBY128 | DBY73, <i>ACT1pr-mCitrine-VPEL222-CYC1t</i> (pDB131)                          | this work | S12a                                            |
| DBY148 | DBY41, <i>5xBS-GAL1pr-Kozak-mCitrine-URA3-CYC1t</i> (pDB152)                  | this work | -                                               |
| DBY149 | DBY41, <i>5xBS-CYC180pr-Kozak-mCitrine-ADHtail-ADH1t</i> (pDB150)             | this work | 1g, S4, S13e                                    |
| DBY158 | MATa/MATalpha, DBY148/BY4742                                                  | this work | 5a, S14                                         |
| DBY150 | BY4741, <i>CAR1::CAR1-mCitrine-HIS3MX</i>                                     | this work | S13a                                            |
| DBY152 | BY4741, <i>TDA1::TDA1-mCitrine-HIS3MX</i>                                     | this work | S13a                                            |
| DBY153 | BY4741, <i>TMA108::TMA108-mCitrine-HIS3MX</i>                                 | this work | S13a                                            |
| DBY154 | BY4741, <i>GPX2::GPX2-mCitrine-HIS3MX</i>                                     | this work | S13a                                            |
| DBY155 | BY4741, <i>HOG1::HOG1-mCitrine-HIS3MX</i>                                     | this work | S13a                                            |
| DBY156 | BY4741, <i>GLY1::GLY1-mCitrine-HIS3MX</i>                                     | this work | S13a                                            |
| DBY157 | BY4741, <i>SOD1::SOD1-mCitrine-HIS3MX</i>                                     | this work | S13a                                            |
| DBY159 | BY4741, <i>GCD11::GCD11-mCitrine-HIS3MX</i>                                   | this work | S13a                                            |
| DBY160 | BY4741, <i>NIP1::NIP1-mCitrine-HIS3MX</i>                                     | this work | S13a                                            |
| DBY161 | BY4741, <i>HEM15::HEM15-mCitrine-HIS3MX</i>                                   | this work | S13a                                            |

**Supplementary Table 3.** Primers and smFISH probes used in this study. For the HIS3-integration and mCitrine-tagging primers, lowercase bases are complementary to plasmid sequences and uppercase bases are complementary to the yeast genome. All smFISH probes are labeled with CY3 at the 5' end. Probe sequences were obtained from ref. 31.

| Primer / probe name | Sequence                                                                 |
|---------------------|--------------------------------------------------------------------------|
| HIS3_insertion_fwd  | TCTTGGCCTCCTAGTACTCTATATTTTTTATGCCTCGGTAATGAgaaaccattattatcatgacattaacc  |
| HIS3_insertion_rv   | TATGGCAACCGCAAGAGCCTTGAACGCACTCTACTACGGatcgcgatgaattcgagctcg             |
| DB464_CAR1_fwd      | TCTCTGCAGGTTGCGCCATTGCAAGGTGTGCATTGGGTGAAACCTTATTGggtgacggctgctggtta     |
| DB465_CAR1_rv       | CTAAAATAAAAAGAGAATGCTTATTTTGATAAAAGGGATGATGATATAAAatcgcgatgaattcgagctcg  |
| DB468_TDA1_fwd      | TAGGTGATGACGATAATGAGGACAGTATGGAAATTGATGATGACCTAGATggtgacggctgctggtta     |
| DB469_TDA1_rv       | TATATTACTGATTCTTGTTTCGAAAGTTTTTAAAAATCACACTATATTTAAatcgcgatgaattcgagctcg |
| DB470_TMA108_fwd    | CATTCCAGGTGAATGTTGATGATTCTGATGGTGTGAAACCATGCAGATAggtgacggctgctggtta      |
| DB471_TMA108_rv     | CCCAGGTAAAAAAGAAAGAAAAAGGTGAATTATCATTCAACAatcgcgatgaattcgagctcg          |
| DB472_GPX2_fwd      | AAGATGAAGAGTCCAGAAAGACTATAAGAAGAGACTTGGCCTCCTTGGTCggtgacggctgctggtta     |
| DB473_GPX2_rv       | GAAGACTACTAAATCTACGTACGATAGTGTGTTGAAATACTGTAAAAAAatcgcgatgaattcgagctcg   |
| DB474_HOG1_fwd      | TAACAAAACCATCGTCTTGACCAAGAAATCCAAGCCTGTTAAGTAAAggtgacggctgctggtta        |
| DB475_HOG1_rv       | AAATGTATTATTTATTGTTCCGGATAATTGCTTGATTATAGACAAAAGATAatcgcgatgaattcgagctcg |
| DB484_SOD1_fwd      | CTGGTAAATGCCGGTCCAAGACCAGCCTGTGGTGTGATTGGTCTAACCAACggtgacggctgctggtta    |
| DB485_SOD1_rv       | CTTACTACTACTTACATACGGTTTTTATTCAAGTATATTATCATTAAACatcgcgatgaattcgagctcg   |
| DB486_GLY1_fwd      | AGGTCGACGTTGATGGCAACGCTATCCGCGAAATAAAACCTACAAATACggtgacggctgctggtta      |
| DB487_GLY1_rv       | CAATCCTAAAACAAAACCTAACAAATACACATGATGCAACTGGAACGCAatcgcgatgaattcgagctcg   |
| DB490_NIP1_fwd      | TTACGGACTACGGTAACCAAGCCATACAGTACGCTAATGAGTTCCAACAGggtgacggctgctggtta     |
| DB491_NIP1_rv       | ACATCAAAAAGAAGTAAGAATGAGTGGTTAGGGACATTAAAAAACACGAtcgcgatgaattcgagctcg    |
| DB492_HEM15_fwd     | ATGATCCTGTAAAGGACCTTTCATTGGTATTTGGCAATCACGAATCTACTggtgacggctgctggtta     |
| DB493_HEM15_rv      | ATAAATAAGAGAATATACTGATATTGAGATTGTGGGATGAATGGCCCTTAAatcgcgatgaattcgagctcg |
| DB494_GCD11_fwd     | TGATTGGTTGGGCAACCATTAAGGGTACTACATTGGAACCCATCGCTggtgacggctgctggtta        |
| DB495_GCD11_rv      | TTTCAGATTAATTATGAAATTTTTGTCTTTCAGTGGTTTTATTGGTTCCatcgcgatgaattcgagctcg   |
| PP7 probe 1         | 5'-[Cyanine3]TTCTAGGCAATTAGGTACCTTA-3'                                   |
| PP7 probe 2         | 5'-[Cyanine3]TTTCTAGAGTCGACCTGCAG-3'                                     |
| PP7 probe 3         | 5'-[Cyanine3]AATGAACCCGGGAATACTGCAG-3'                                   |

**Supplementary Table 4.** Estimated parameters for the VP-EL222 model.

| Parameter                                                              | Description                                          | value: 5xBS-C180pr | value: 2xBS-C180pr |
|------------------------------------------------------------------------|------------------------------------------------------|--------------------|--------------------|
| $TF_{total}$ (molecules)                                               | total cellular TF                                    | 2000               | 2000               |
| $k_{on}$ ( $\text{min}^{-1} * (\text{uW cm}^{-2})^{-1}$ )              | light dependant VP-EL222 activation rate             | 0.0016399          | 0.0016399          |
| $k_{off}$ ( $\text{min}^{-1}$ )                                        | VP-EL222 dark-state reversion rate                   | 0.34393            | 0.34393            |
| $k_{basal}$ ( $\text{mRNA} * \text{min}^{-1}$ )                        | basal transcription rate                             | 0.02612            | 0.24358            |
| $k_{max}$ ( $\text{mRNA} * \text{min}^{-1}$ )                          | maximal induced transcription rate                   | 13.588             | 11.031             |
| $K_d$ (molecules)                                                      | $TF_{on}$ level required for achieving $k_{max} / 2$ | 956.75             | 1462.5             |
| $n$ (-)                                                                | hill coefficient                                     | 4.203              | 4.6403             |
| $k_{degR}$ ( $\text{min}^{-1}$ )                                       | mRNA degradation rate                                | 0.042116           | 0.042116           |
| $k_{trans}$ ( $\text{proteins} * \text{min}^{-1} * \text{mRNA}^{-1}$ ) | translation rate                                     | 1.4514             | 1.4514             |
| $k_{degP}$ ( $\text{min}^{-1}$ )                                       | protein degradation rate                             | 0.007              | 0.007              |

**Supplementary Table 5.** Proteins used for calibration of protein copy numbers. The reporter molecule numbers represent the mean classified as being measured in minimal media and mid-log growth phase. See Supplementary Note 4 for further details on calibration.

| Protein Name | Molecules per cell |
|--------------|--------------------|
| Tda1p        | 5528               |
| Tma108p      | 5909               |
| Hog1p        | 6795               |
| Gpx2p        | 7588               |
| Hem15p       | 8271               |
| Gcd11p       | 25373              |
| Nip1p        | 30394              |
| Car1p        | 36627              |
| Sod1p        | 76172              |
| Gly1p        | 104465             |

**Supplementary Table 6.** Parameters used for stochastic simulations of the VP-EL222 model. For the transcription-translation model (Supplementary Fig. 13c,d), multiple parameter combinations of  $k_{\max}$  and  $k_{\text{trans}}$  were used (all are summarized in the table).

| Parameter                                                                | Description                                          | Two-state model (diploid/haploid) | Transcription-Translation     |
|--------------------------------------------------------------------------|------------------------------------------------------|-----------------------------------|-------------------------------|
| $k_{\text{TFtc}}(\text{mRNA} * \text{min}^{-1})$                         | TF mRNA transcription rate                           | 0.332 / 0.166                     | 0.332                         |
| $k_{\text{degTFr}}(\text{min}^{-1})$                                     | TF mRNA degradation rate                             | 0.063                             | 0.063                         |
| $k_{\text{TFtl}}(\text{proteins} * \text{min}^{-1} * \text{mRNA}^{-1})$  | TF translation rate                                  | 32.6359                           | 32.6359                       |
| $k_{\text{degTFr}}(\text{min}^{-1})$                                     | TF degradation rate                                  | 0.007                             | 0.007                         |
| $k_{\text{on}}(\text{min}^{-1} * (\text{uW cm}^{-2})^{-1})$              | light dependant VP-EL222 activation rate             | 0.0016399                         | 0.0016399                     |
| $k_{\text{off}}(\text{min}^{-1})$                                        | VP-EL222 dark-state reversion rate                   | 0.34393                           | 0.34393                       |
| $k_{\text{Pon}}(\text{min}^{-1})$                                        | maximal Promoter on switch rate                      | 1                                 | -                             |
| $k_{\text{Poff}}(\text{min}^{-1})$                                       | maximal Promoter off switch rate                     | 1                                 | -                             |
| $k_{\text{basal}}(\text{mRNA} * \text{min}^{-1})$                        | basal transcription rate                             | 0.02612                           | 0.02612 / 0.002612 / 0.002612 |
| $k_{\text{max}}(\text{mRNA} * \text{min}^{-1})$                          | maximal induced transcription rate                   | 13.588                            | 13.588 / 1.3588 / 0.13588     |
| $K_{\text{d}}(\text{molecules})$                                         | TFon level required for achieving $k_{\text{max}}/2$ | 11756 / 5878                      | 11756                         |
| $n$ (-)                                                                  | hill coefficient                                     | 4.203                             | 4.6403                        |
| $k_{\text{degR}}(\text{min}^{-1})$                                       | mRNA degradation rate                                | 0.042116                          | 0.042116                      |
| $k_{\text{trans}}(\text{proteins} * \text{min}^{-1} * \text{mRNA}^{-1})$ | translation rate                                     | 11.4639                           | 11.4639 / 114.639 / 1146.39   |
| $k_{\text{degP}}(\text{min}^{-1})$                                       | protein degradation rate                             | 0.007 (0.03 in Fig. S13e)         | 0.007                         |

**Supplementary Table 7.** Parameters for hill function fit describing the mapping of Ura3p levels to cell growth (shown in Fig. 5). Equation:  $\text{Growth-rate} = k_{\text{m}} * \text{Ura3p}^n / (\text{Ura3p}^n + K_{\text{d}}^n)$ , where Ura3p is equated to the measured mCitrine fluorescence.

| Parameter                      | AM     | PWM    |
|--------------------------------|--------|--------|
| $k_{\text{m}} (\text{h}^{-1})$ | 0.467  | 0.426  |
| $n$                            | 2.28   | 3.91   |
| $K_{\text{d}}$                 | 0.0186 | 0.0149 |

## **Supplementary References**

1. Gordon, A. *et al.* Single-cell quantification of molecules and rates using open-source microscope-based cytometry. *Nat. Methods* **4**, 175–181 (2007).
2. Gnügge, R., Liphardt, T. & Rudolf, F. A shuttle vector series for precise genetic engineering of *Saccharomyces cerevisiae*. *Yeast* **33**, 83–98 (2016).
3. Hansen, A. S. & O’Shea, E. K. Promoter decoding of transcription factor dynamics involves a trade-off between noise and control of gene expression. *Mol. Syst. Biol.* **9**, 704 (2013).
4. Larson, D. R., Zenklusen, D., Wu, B., Chao, J. A. & Singer, R. H. Real-time observation of transcription initiation and elongation on an endogenous yeast gene. *Science* **332**, 475–478 (2011).
5. Belle, A., Tanay, A., Bitincka, L., Shamir, R. & O’Shea, E. K. Quantification of protein half-lives in the budding yeast proteome. *Proc. Natl. Acad. Sci. U. S. A.* **103**, 13004–13009 (2006).
6. Wang, Y. *et al.* Precision and functional specificity in mRNA decay. *Proc. Natl. Acad. Sci. U. S. A.* **99**, 5860–5865 (2002).
7. Sun, M. *et al.* Global analysis of eukaryotic mRNA degradation reveals Xrn1-dependent buffering of transcript levels. *Mol. Cell* **52**, 52–62 (2013).
8. Zoltowski, B. D., Nash, A. I. & Gardner, K. H. Variations in Protein–Flavin Hydrogen Bonding in a Light, Oxygen, Voltage Domain Produce Non-Arrhenius Kinetics of Adduct Decay. *Biochemistry* **50**, 8771–8779 (2011).
9. Motta-Mena, L. B. *et al.* An optogenetic gene expression system with rapid activation and deactivation kinetics. *Nat. Chem. Biol.* **10**, 196–202 (2014).
10. Eden, E. *et al.* Proteome half-life dynamics in living human cells. *Science* **331**, 764–768 (2011).
11. Schwanhäusser, B. *et al.* Global quantification of mammalian gene expression control. *Nature* **473**, 337–342 (2011).
12. Volfson, D. *et al.* Origins of extrinsic variability in eukaryotic gene expression. *Nature* **439**, 861–864 (2005).
13. Zopf, C. J., Quinn, K., Zeidman, J. & Maheshri, N. Cell-cycle dependence of transcription dominates noise in gene expression. *PLoS Comput. Biol.* **9**, e1003161 (2013).
14. Spencer, S. L., Gaudet, S., Albeck, J. G., Burke, J. M. & Sorger, P. K. Non-genetic origins of cell-to-cell variability in TRAIL-induced apoptosis. *Nature* **459**, 428–432 (2009).
15. Zechner, C., Unger, M., Pelet, S., Peter, M. & Koepl, H. Scalable inference of heterogeneous reaction kinetics from pooled single-cell recordings. *Nat. Methods* **11**, 197–202 (2014).
16. Ho, B., Baryshnikova, A. & Brown, G. W. Unification of Protein Abundance Datasets Yields a Quantitative *Saccharomyces cerevisiae* Proteome. *Cell Syst* **6**, 192–205.e3 (2018).
17. Zenklusen, D., Larson, D. R. & Singer, R. H. Single-RNA counting reveals alternative modes of gene expression in yeast. *Nat. Struct. Mol. Biol.* **15**, 1263–1271 (2008).
18. Curran, K. A., Karim, A. S., Gupta, A. & Alper, H. S. Use of expression-enhancing terminators in *Saccharomyces cerevisiae* to increase mRNA half-life and improve gene expression control for metabolic engineering applications. *Metab. Eng.* **19**, 88–97 (2013).

19. Thattai, M. & van Oudenaarden, A. Intrinsic noise in gene regulatory networks. *Proceedings of the National Academy of Sciences* **98**, 8614–8619 (2001).
20. Rullan, M., Benzinger, D., Schmidt, G. W., Miliadis-Argeitis, A. & Khammash, M. An Optogenetic Platform for Real-Time, Single-Cell Interrogation of Stochastic Transcriptional Regulation. *Mol. Cell* **70**, 745–756.e6 (2018).
21. Raser, J. M. & O’Shea, E. K. Control of Stochasticity in Eukaryotic Gene Expression. *Science* **304**, 1811–1814 (2004).
22. Elowitz, M. B., Arnold, J. V., Siggia, E. D. & Swain, P. S. Stochastic Gene Expression in a Single Cell. *Science* **297**, 1183–1186 (2002).
23. Gillespie, D. T. Exact stochastic simulation of coupled chemical reactions. *J. Phys. Chem.* **81**, 2340–2361 (1977).
24. Griesbeck, O., Baird, G. S., Campbell, R. E., Zacharias, D. A. & Tsien, R. Y. Reducing the Environmental Sensitivity of Yellow Fluorescent Protein. *J. Biol. Chem.* **276**, 29188–29194 (2001).
25. Shcherbo, D. *et al.* Far-red fluorescent tags for protein imaging in living tissues. *Biochem. J* **418**, 567–574 (2009).
26. Brachmann, C. B. *et al.* Designer deletion strains derived from *Saccharomyces cerevisiae* S288C: a useful set of strains and plasmids for PCR-mediated gene disruption and other applications. *Yeast* **14**, 115–132 (1998).
27. Longtine, M. S. *et al.* Additional modules for versatile and economical PCR-based gene deletion and modification in *Saccharomyces cerevisiae*. *Yeast* **14**, 953–961 (1998).
28. McIsaac, R. S. *et al.* Synthetic gene expression perturbation systems with rapid, tunable, single-gene specificity in yeast. *Nucleic Acids Res.* **41**, e57 (2013).
29. Vidal, M., Brachmann, R. K., Fattaey, A., Harlow, E. & Boeke, J. D. Reverse two-hybrid and one-hybrid systems to detect dissociation of protein-protein and DNA-protein interactions. *Proc. Natl. Acad. Sci. U. S. A.* **93**, 10315–10320 (1996).
30. Hocine, S., Raymond, P., Zenklusen, D., Chao, J. A. & Singer, R. H. Single-molecule analysis of gene expression using two-color RNA labeling in live yeast. *Nat. Methods* **10**, 119–121 (2013).
31. Ochiai, H., Sugawara, T., Sakuma, T. & Yamamoto, T. Stochastic promoter activation affects Nanog expression variability in mouse embryonic stem cells. *Sci. Rep.* **4**, 7125 (2014).
